1

1 **Boosting with ALVAC-HIV and AIDSVAX B/E enhances Env constant region 1 and 2**  
2 **antibody-dependent cellular cytotoxicity**

3 By

4 David Easterhoff<sup>1\*</sup>, Justin Pollara<sup>1</sup>, Kan Luo<sup>1</sup>, William D. Tolbert<sup>12</sup>, Brianna Young<sup>11</sup>, Dieter  
5 Mielke<sup>1</sup>, Shalini Jha<sup>1</sup>, Robert J. O’Connell<sup>3</sup>, Sandhya Vasan<sup>2,3,10</sup>, Jerome Kim<sup>2\*\*</sup>, Nelson L.  
6 Michael<sup>2,10</sup>, Jean-Louis Excler<sup>2,10\*\*</sup>, Merlin L. Robb<sup>2,10</sup>, Supachai Rerks-Ngarm<sup>5</sup>, Jaranit  
7 Kaewkungwal<sup>6</sup>, Punnee Pitisuttithum<sup>6</sup>, Sorachai Nitayaphan<sup>7</sup>, Faruk Sinangil<sup>8</sup>, James Tartaglia<sup>9</sup>,  
8 Sanjay Phogat<sup>9#</sup>, Thomas B. Kepler<sup>4</sup>, S. Munir Alam<sup>1</sup>, Kevin Wiehe<sup>1</sup>, Kevin O. Saunders<sup>1</sup>, David  
9 C. Montefiori<sup>1</sup>, Georgia D. Tomaras<sup>1</sup>, M. Anthony Moody<sup>1</sup>, Marzena Pazgier<sup>12</sup>, Barton F.  
10 Haynes<sup>1\*</sup> and Guido Ferrari<sup>1\*</sup>

11  
12 <sup>1</sup>Duke University, Durham, NC; <sup>2</sup>US Military HIV Research Program, Walter Reed Army  
13 Institute of Research, Silver Spring, MD ; <sup>3</sup>U.S. Army Medical Directorate, AFRIMS,  
14 Bangkok, Thailand; <sup>4</sup>Boston University, Boston, MA; <sup>5</sup>Thai Ministry of Public Health,  
15 Nonthaburi, Thailand; <sup>6</sup>Mahidol University, Bangkok, Thailand; <sup>7</sup>Royal Thai Army  
16 Component, AFRIMS, Bangkok, Thailand; <sup>8</sup>Global Solutions of Infectious Diseases,  
17 South San Francisco, CA; <sup>9</sup>Sanofi Pasteur, Swiftwater, PA; NH; <sup>10</sup>The Henry M.  
18 Jackson Foundation for the Advancement of Military Medicine, Bethesda, MD;  
19 <sup>11</sup>Department of Biochemistry and Molecular Biology of University of Maryland,  
20 Baltimore, MD USA . <sup>12</sup>Infectious Diseases Division, Uniformed Services University of  
21 the Health Sciences, Bethesda, MD, USA,

22 \*\* Current affiliation: International Vaccine Institute, Seoul, Republic of Korea

23 # Current affiliation: Glaxosmithkline, USA

24 \*Correspondence: [david.easterhoff@duke.edu](mailto:david.easterhoff@duke.edu) (D.E.), [barton.haynes@duke.edu](mailto:barton.haynes@duke.edu) (B.F.H.) and  
25 [guido.ferrari@duke.edu](mailto:guido.ferrari@duke.edu) and (G.F.)

26 **Significance**

27 Over one million people become infected with HIV-1 each year making the development  
28 of an efficacious HIV-1 vaccine an important unmet medical need. The RV144 human  
29 HIV-1 vaccine-regimen is the only HIV-1 clinical trial to date to demonstrate vaccine-  
30 efficacy. An area of focus has been on identifying ways by which to improve upon  
31 RV144 vaccine-efficacy. The RV305 HIV-1 vaccine-regimen was a follow-up boost of  
32 RV144 vaccine-recipients that occurred 6-8 years after the conclusion of RV144. Our

33 studies focused on the effect of delayed boosting in humans on the vaccine-induced  
34 antibody repertoire. It was found that boosting with a HIV-1 Env vaccine increased  
35 antibody-mediated effector function potency and breadth.

## 36 **Abstract**

37 Induction of protective antibodies is a critical goal of HIV-1 vaccine development. One  
38 strategy is to induce non-neutralizing antibodies that kill virus-infected cells as these  
39 antibody specificities have been implicated in slowing HIV-1 disease progression and in  
40 protection. HIV-1 Env constant region 1 and 2 (C1C2) antibodies frequently contain  
41 potent antibody dependent cellular cytotoxicity (ADCC) making them a vaccine target.  
42 Here we explore the effect of delayed and repetitive boosting of RV144 vaccinee  
43 recipients with ALVAC/AIDSVAX B/E on the C1C2-specific antibody repertoire. It was  
44 found that boosting increased clonal lineage specific ADCC breadth and potency. A  
45 ligand crystal structure of a vaccine-induced broad and potent ADCC-mediating C1C2-  
46 specific antibody showed that it bound a highly conserved Env gp120 epitope. Thus,  
47 rationally designed boosting strategies to affinity mature these type of IgG C1C2-  
48 specific antibody responses may be one method by which to make an improved HIV  
49 vaccine with higher efficacy than seen in the RV144 trial.

## 50 **INTRODUCTION**

51 CD4-inducible (CD4i) epitopes within HIV-1 envelope (Env) constant regions 1 and  
52 2 (C1C2) are targets for antibodies that mediate antibody dependent cellular cytotoxicity  
53 (ADCC) [1]. C1C2-specific antibody epitopes have been termed Cluster A [1] and defined  
54 by two Env-targeted monoclonal antibodies (mAbs), A32 [2] and C11 [1]. Structural  
55 analyses of antigen complexes formed by A32, A32-like [3-5] and C11-like antibodies [6]

56 indicate that these antibodies bind distinct Env epitopes. The A32 epitope involves a  
57 discontinuous sequence within layers 1 and 2 of the inner domain [4, 5] while the C11  
58 epitope maps to the inner domain eight-stranded  $\beta$  sandwich [6]. Importantly, both  
59 antibodies are non-neutralizing for tier 2 HIV strains, but are capable of broad and potent  
60 ADCC [1, 2].

61         The secondary analysis of HIV-1 infection risk in RV114 (NCT00223080)  
62 indicated that ADCC in the presence of low anti-Env IgA responses correlated with  
63 decreased HIV-1 acquisition [7]. While antibodies representative of the Env variable  
64 region 2 (V2) response inversely correlated with HIV-1 acquisition [7], we previously  
65 demonstrated that synergy between A32-blockable C1C2-specific antibodies and V2-  
66 specific antibodies increased the potency of V2 antibodies induced in the RV144 trial  
67 [8].

68         Here we have studied the effects of late boosting of RV144 vaccinees on affinity  
69 maturation and potency of C1C2-specific ADCC antibodies in the RV305 HIV-1 vaccine  
70 trial (NCT01435135). We found that ALVAC/AIDS VAX B/E immunizations induced  
71 C1C2-specific antibodies and that late booster immunizations increased C1C2-specific  
72 antibody variable heavy and variable light ( $V_H + V_L$ ) chain gene mutation frequencies  
73 and increased their ADCC breadth and potency.

## 74 **RESULTS**

### 75 **AIDS VAX B/E N-terminal deletion alters C1C2-specific antibody responses.**

76 AIDS VAX B/E protein used in the RV144 and RV305 HIV-1 vaccine trial had an eleven  
77 amino acid N-terminal deletion [9] that removed a majority of the C11-like antibody  
78 epitope [6], whereas CRF\_01\_AE\_gp140\_Env\_92TH023 in ALVAC (vCP1521) did have

79 the gp120 N-terminal 11 amino acids [10]. To determine if C11 could bind to gp120  
80 proteins with an 11 amino acid N-terminal deletion, we assayed A32 and C11 antibodies  
81 for binding to full length AE.A244gp120 or to AE.A244gp120 $\Delta$ 11 (N-terminal 11 aa  
82 deleted). Antibody A32 bound to full length AE.A244gp120 and A32 binding was  
83 enhanced on AE.A244gp120 $\Delta$ 11 (**Fig. 1A**) [9]. In contrast, antibody C11 only bound to  
84 the full length AE.A244gp120 (**Fig 1A**). From these data we concluded that C11-like  
85 antibody responses were unlikely to be boosted by AIDSVAX B/E.

86 A total of 19 RV305-derived NNABs isolated from four individuals (**Table S1 &**  
87 **S2**) were identified that blocked the C1C2 mAb A32 binding to AE.A244gp120 $\Delta$ 11 (**Fig**  
88 **1B**). Compared to previously published RV144 C1C2-specific antibodies [11] the RV305  
89 C1C2-specific antibodies had significantly more V<sub>H</sub> and V<sub>L</sub> chain gene mutations  
90 (Wilcoxon rank sum test  $P < 0.0001$ ) (**Fig 1C**) suggesting that RV305 boosting induced  
91 additional somatic mutations in C1C2-specific antibodies.

92 To determine if RV305 boosted A32 blockable antibodies contained a binding  
93 epitope similar to A32, we used the A32 ligand crystal structure [5] to identify critical  
94 A32 antibody contact residues, and then designed an AE.A244gp120 $\Delta$ 11 mutant  
95 protein (AE.A244gp120 $\Delta$ 11 F35S, H72L, V75A, E106K, D107H, S110A, Q114L) to  
96 eliminate A32-like antibody binding (**Fig 1A**). In ELISA, the RV305 antibody, DH838,  
97 was the only antibody with binding eliminated by mutating the A32 epitope (**Fig 1D**).  
98 Likewise, DH838 was the only antibody that used a VH3 family gene while all other  
99 ALVAC/AIDSVAX B/E – induced C1C2-specific antibodies used VH1 genes (**Table S1**).  
100 Thus, as in RV144, ALVAC/AIDSVAX B/E boosting preferentially expanded VH1 gene

101 C1C2-specific antibodies [11] and these antibodies bound epitopes distinct from A32  
102 but in close enough proximity to be sterically cross-blocked by A32 (**Fig 1B**).

103 **Boosting increased C1C2-specific ADCC breadth and potency.** RV305

104 C1C2-specific antibodies and a subset of RV144 C1C2-specific antibodies were next  
105 assessed for ADCC against a cross-clade panel of HIV-1 infectious molecular clone  
106 (IMC) infected CD4+ T cells (HIV-1 AE.CM235, B.WITO, C.TV-1, C.MW965, C.1086C,  
107 C.DU151 and C.DU422). Antibodies were ranked using an ADCC score (See methods)  
108 that accounted for ADCC breadth and potency. Apart from the RV144-derived A32  
109 blockable antibody CH38, which was naturally an IgA antibody but tested here as a  
110 recombinant IgG1 antibody, 16/19 RV305 antibodies ranked higher than the RV144  
111 antibodies (**Table 1**). Next RV305 derived C1C2-specific antibody heavy chain gene  
112 mutation frequency was used as a proxy for responsiveness to boosting and compared  
113 to the ADCC score. The  $V_H$  mutation frequency (% nucleotide) inversely correlated with  
114 the ADCC score (Spearman Correlation -0.5599; p value = 0.0127) (**Fig S1**). However  
115 the  $V_H$  mutation frequency of those antibodies with the highest ADCC scores were  
116 above the average heavy chain gene mutation frequency for RV144 (**Fig S1 Fig 1C**).  
117 Thus, while a RV144 boosting regimen was necessary to increase C1C2-specific ADCC  
118 breadth and potency, additional boosting with same immunogens may not be beneficial.

119 **Boosting of RV144 vaccinees in the RV305 trial increased ADCC breadth and**  
120 **potency of the RV144 derived C1C2-specific, DH677 clonal lineage.** Next the C1C2-

121 specific DH677 memory B cell clonal lineage was used to study affinity maturation and  
122 ontogeny of ALVAC/AIDS VAX B/E-induced ADCC responses. B cell clonal lineage  
123 member DH677.1 arose after the original RV144 trial (ALVAC + AIDS VAX B/E) and the

124 DH677.2, DH677.3 and DH677.4 clonal lineage members were isolated after delayed  
125 and repetitive boosting with AIDSVAX B/E alone (RV305 Group II). Thus, this B cell  
126 clonal lineage belongs to a long-lived memory B cell pool started by the RV144 vaccine-  
127 regimen and boosted many years later with the RV305 vaccine-regimen (**Fig 2**). The  
128 DH677 clonal lineage was assayed by surface plasmon resonance for binding to the  
129 AIDSVAX B/E proteins - AE.A244gp120 $\Delta$ 11 and B.MNgp120 $\Delta$ 11 – as well as full length  
130 AE.A244gp120. DH677 unmutated common ancestor (UCA) did not bind to  
131 B.MNgp120 $\Delta$ 11, had minimal binding to the full length AE.A244gp120 and this binding  
132 was enhanced with AE.A244gp120 $\Delta$ 11 (**Fig 2 and Fig S2**). The RV305 boosts more  
133 than doubled the V<sub>H</sub> chain gene mutation frequency from 1.04% (DH677.1; RV144) up  
134 to 4.51% (DH677.4; RV305) which resulted in 100-fold increase in apparent affinity for  
135 the AIDSVAX B/E proteins (DH677.1 AE.A244gp120 $\Delta$ 11 K<sub>D</sub>= 45.2 & B.MNgp120 $\Delta$ 11  
136 K<sub>D</sub> =219 to DH677.4 AE.A244gp120 $\Delta$ 11 K<sub>D</sub>= 0.49 & B.MNgp120 $\Delta$ 11 K<sub>D</sub> =2.86) and also  
137 improved binding to full length AE.A244gp120 (**Fig 2 and Fig S2**).

138 The ontogeny of vaccine-induced ADCC was studied by assaying the DH677  
139 clonal lineage against a cross-clade panel of IMC infected cells (AE.CM235, B.WITO,  
140 C.TV-1, C.MW965, C.1086C, C.DU151 and C.DU422). The RV144 prime-boost  
141 immunization regimen minimally increased ADCC breadth and potency (DH677 UCA  
142 ADCC Score = -2.32; DH677.1 ADCC Score = -2.20 (see methods)). Conversely,  
143 RV305 boosting substantially increased ADCC breadth and potency (DH677.3 ADCC  
144 Score = 4.56) (**Fig 2 and Fig S3**). These data indicated that the RV144 prime-boost  
145 regimen was insufficient to fully affinity mature this C1C2-specific B cell clonal lineage.

146 Rather RV305 trial boosting of this particular RV144 vaccinee profoundly enhanced  
147 DH677 lineage ADCC breadth and potency.

148 **Crystal structure of the potent ADCC-mediating antibody DH677.3.** We next  
149 determined the crystal structures of the antigen binding fragment (Fab) of the highest  
150 ranking RV305 ADCC antibody DH677.3 (**Table 1**) - alone and in complex with clade AE  
151 gp120<sub>93TH057</sub> core<sub>e</sub> plus the CD4-mimetic M48-U1 (**Table S3**). DH677.3 Fab-gp120<sub>93TH057</sub>  
152 core<sub>e</sub>-M48U1 complex (**Fig 3**) showed that, similar to other Cluster A antibodies, DH677.3  
153 approaches gp120 at the face that is buried in the native Env trimer [3-5] and binds the  
154 C1C2 region exclusively within the gp120 inner domain. gp120 residues involved in  
155 DH677.3 binding map to the base of the 7-stranded  $\beta$ -sandwich (residues 82, 84, 86-87,  
156 222-224, 244-246, and 491-492) and its extensions into the mobile layers 1 (residues 53,  
157 60, 70-80) and 2 (residues 218-221). By docking at the layer 1/2/  $\beta$  -sandwich junction  
158 the antibody buried surface area (BSA) utilizes 248  $\text{\AA}^2$  of the  $\beta$ -sandwich, 542  $\text{\AA}^2$  of layer  
159 1 and 135  $\text{\AA}^2$  of layer 2 (**Table S4**). The majority of contacts providing specificity involve  
160 a network of hydrogen bonds and a salt bridge (**Fig 3A, inset**) contributed by the antibody  
161 heavy chain and gp120 side chain atoms of layer 1 ( $\alpha$  turn connecting the  $\beta 7$ -- $\beta 0$  strands,  
162 D<sup>78</sup> and N<sup>80</sup>) and the 7-stranded-  $\beta$ -sandwich (strand  $\beta 7$ , Q<sup>246</sup>). The contacts provided by  
163 the light chain are less specific and consist of hydrogen bonds to the gp120 main chain  
164 atoms and hydrophobic contacts within a hydrophobic cleft formed at the layer 1/2/ $\beta$ -  
165 sandwich junction (**Fig 3B and C**). Overall DH677.3 utilizes all six of its complementary  
166 determining regions (CDRs), and relies approximately equally on both heavy chain and  
167 light chain with a total buried surface area (BSA) of 973  $\text{\AA}^2$ : 498  $\text{\AA}^2$  for the light chain and  
168 475  $\text{\AA}^2$  for the heavy chain (**Table S4 and Fig 3C and S5**). Interestingly, 25 of 29 gp120

169 contact residues are conserved in >80% of sequences in the HIV Sequence Database  
170 Compendium  
171 (<https://www.hiv.lanl.gov/content/sequence/HIV/COMPENDIUM/compendium.html>) with  
172 15 of 29 being effectively invariant (>99% conserved) (**Fig 3B**).

173 **Comparison of the DH677.3 mode of binding and epitope footprint to Cluster A**  
174 **prototype antibodies.** Antigen complex structures of mAb A32 and N12-i3 (C11-like) [3,  
175 6], antibodies isolated from HIV-1-infected individuals, confirm that DH677.3 recognized  
176 a unique epitope between the A32 and C11 antibody-binding sites involving Env epitope  
177 elements of both (**Fig 4**). While the A32 antibody epitope consists exclusively of gp120  
178 mobile layers 1 and 2 (76% and 24% of gp120 BSA, respectively; **Table S4, Fig 4 B and**  
179 **C**), DH677.3 relies less on layers 1 and 2 (53% and 14% of gp120 BSA, respectively) and  
180 effectively utilizes the gp120 7-stranded  $\beta$ -sandwich (24% of gp120 BSA) (**Table S4, Fig**  
181 **4 B and C**). The ability to recognize the 7-stranded  $\beta$ -sandwich renders DH677.3 similar  
182 to the C11-like antibody N12-i3, which almost exclusively depends on the  $\beta$ -sandwich for  
183 binding (94% of its total gp120 BSA; **Table S4, Fig 4 B and C**). Interestingly, N12-i3 and  
184 other C11-like antibodies require the N-terminus of gp120 for binding and recognize a  
185 unique gp120 conformation formed by docking of the gp120 N-terminus as an 8<sup>th</sup> strand  
186 to the  $\beta$ -sandwich to form an 8-stranded- $\beta$ -sandwich structure [6]. The DH677.3 complex  
187 crystals were obtained with gp120<sub>93TH057</sub> core<sub>e</sub> which lacks the N-terminus ( $\Delta$ 11 aa  
188 deletion) and therefore the direct judgment, based on structure, whether or not the 8<sup>th</sup>  
189 strand is involved in binding was not possible (**Fig 3**). However, we were able to model  
190 the N/C-termini-gp120<sub>93TH057</sub> core<sub>e</sub> from the N12-i3 Fab complex structure (PDB code:  
191 5W4L) to the DH677.3 Fab-gp120<sub>93TH057</sub> core<sub>e</sub>-M48U1 complex without any steric



192 clashes (**Fig 4A, inset**). Both the conformation and orientation of CDR H1 and 2 of  
193 DH677.3 allowed easy access to the 8-stranded- $\beta$ -sandwich structure and enabled  
194 contacts to the 8<sup>th</sup> strand. These data indicated that DH677.3 is capable of  
195 accommodating both the 7 and 8-stranded- $\beta$ -sandwich conformations of gp120 with  
196 effective contacts to the 8<sup>th</sup> strand. Thus, the DH677.3 C1C2 antibody has a unique  
197 binding angle to the C1C2 region compared to C1C2 antibodies C11 and A32.

### 198 **DH677 lineage antibodies mediate ADCC against CD4 downmodulated HIV-1**

199 **infected cells.** During natural infection the HIV-1 accessory protein Nef downregulates  
200 CD4 expression on the surface of virus infected cells [12, 13]. Cell surface expressed  
201 CD4 facilitates the exposure of CD4i Env epitopes – like C1C2 - by binding to co-  
202 expressed cell surface Env [14]. The analyses of ADCC breadth was performed using  
203 target cells infected with IMCs containing the *Renilla* luciferase (LucR) reporter gene,  
204 which restricts Nef expression leading to incomplete CD4 downregulation [15].  
205 Nevertheless, Vpu expression can compensate for Nef function and induce CD4  
206 downregulation during the 72 hour incubation of the target cells before assays were  
207 performed. To exclude any possible impact of this technical aspect of IMCs with LucR  
208 on our ADCC results, full length IMCs (n=7) that do not contain a report gene were used  
209 to evaluate ADCC of the affinity matured RV305 C1C2-specific antibodies DH677.3 and  
210 DH677.4 and A32 [2], against target cells positive for intracellular p24 (p24+) and with  
211 downregulated CD4 (CD4-). As clade CRF01\_AE possess a histidine at Env HXB2  
212 position 375 that influences sensitivity to CD4i antibody binding and ADCC [16, 17] only  
213 clade B and clade C isolates were used.

214           When evaluating elimination of total p24+ cells no significant difference  
215 (Wilcoxon rank sum test;  $p > 0.05$ ) in specific killing was noted among the three different  
216 antibodies (**Fig 5A**). However, when infected cells were separated into p24+CD4+ (**Fig**  
217 **5B**) and p24+CD4- (**Fig 5C**) it was found that the RV305-boosted DH677.3 antibody  
218 was significantly better (Wilcoxon rank sum test  $p = 0.03$ ) at mediating ADCC against  
219 p24+ CD4- infected cells (**Fig 5C**) when compared to A32. These data indicate that the  
220 DH677 clonal lineage epitope was more frequently exposed on Env conformers on the  
221 surface of IMC infected cells even in the context of CD4 downmodulation making this  
222 epitope a highly desirable NNAb vaccine target and important consideration in the  
223 setting of cure AIDS initiatives.

## 224 **DISCUSSION**

225           In this study it was found that late boosting of RV144 vaccinees increased C1C2-  
226 specific antibody  $V_H + V_L$  chain gene mutation frequency and increased clonal lineage  
227 specific ADCC breadth and potency (**Table 1, Fig 2**). Most RV305 derived antibodies  
228 had broader and more potent ADCC activity than the RV144 derived antibodies (**Table**  
229 **1**) but  $V_H$  chain gene mutation frequency and the ADCC score did not directly correlate  
230 (**Fig S1**). While RV305 was necessary to mature C1C2-specific antibody responses,  
231 additional boosting with ALVAC/AIDSVAX B/E would not increase ADCC breadth and  
232 potency. Likely rationally designed sequential [18] boosting immunogens to select for  
233 critical mutations [19] that directionally affinity mature highly functional  
234 ALVAC/AIDSVAX B/E-induced C1C2-specific antibodies are needed.

235           Improving vaccine-induced NNAb effector function will also require more detailed  
236 immunological studies on the timing and frequency of boosting. In VAX003

237 (NCT00002441) and VAX004 (NCT00002441) trials frequent protein immunizations  
238 skewed Env-specific antibody subclass usage from the highly functional IgG3 to IgG4  
239 [20-22]. The RV305 boosts that were studied here occurred several years (6-8yrs) later,  
240 unlike previous HIV-1 vaccine trials. Whether the boosting interval can be shortened  
241 without skewing antibody subclass usage is not known, but it is possible that boosting  
242 with long rest intervals ( $\geq 1-2$  years) will be necessary.

243         The AIDSVAX B/E protein used for boosting in the RV144 and RV305 HIV-1  
244 vaccine trial contained an N-terminal 11 amino acid deletion with important implications  
245 for NNAb induction. Previously it was shown that this modification enhanced exposure  
246 of the C1C2 region and V2 loop [9]. Here we show that this modification disrupts C11-  
247 like antibody binding (**Fig 1**) but does creates a germline-targeting immunogen for  
248 DH677-like B cell lineages (**Fig S2**). Ligand crystal structure analysis found that  
249 DH677.3 recognized a unique C1C2 epitope that involves parts of epitope footprints of  
250 C1C2 Cluster A antibodies A32 and N12-i3 (C11-like) as well as new elements of the  
251 inner domain Layer 1 and the 7-stranded- $\beta$ -sandwich (**Fig 3 and 4**). The DH677.3  
252 epitope is positioned midway between the A32 and N12-i3 binding sites with most  
253 residues being highly conserved. Interestingly, DH677.3 binds at the edge of the gp120  
254 inner domain 7-stranded  $\beta$ -sandwich and with layers 1 and 2 with a binding mode that  
255 allows it to accommodate the addition of the N-terminus as the 8<sup>th</sup> strand to the 7-  
256 stranded- $\beta$ -sandwich, a gp120 conformation emblematic of the late stages of HIV entry  
257 and recognized by C11 and C11-like antibodies [6]. Most likely this feature allows  
258 DH677.3 to recognize a broader range of Env targets, emerging in both the early (when  
259 A32 epitope becomes available) and late stage (when C11 epitope becomes available)

260 of the viral entry process. Identification of a stage 2A of the HIV-1 Env expressed on  
261 the surface of infected cells in presence of the CD4 molecule or CD4 mimetics reiterate  
262 the importance of targeting these epitopes by vaccine induced responses as detected in  
263 our assays [23]. In addition, a model of DH677.3 in complex with gp120 antigen bound  
264 to a CD4 of a target/infected cell confirms that the recognition site and angle of  
265 approach position the DH677.3 IgG for easy access for effector cell recognition and Fc-  
266 effector complex formation (**Fig 4A**).

267 ADCC-mediating antibodies have been shown to reduce mother-to-child HIV-1  
268 transmission [24-26], slow virus disease progression [26-28] and in RV144 correlated  
269 with reduced risk of infection in vaccine recipients with lower anti-Env plasma IgA  
270 responses [7]. Synergy between the RV144 C1C2 and V1V2 mAbs suggest a role for  
271 the C1C2 plasma responses that could not be directly identify by the correlates of  
272 protection study. Based on the data reported in this study and by Zoubchenok et al [16]  
273 , it is clear that the magnitude of Env susceptibility to ADCC by the C1C2-specific Ab  
274 responses is not consistent as suggested by the conserved sequence of this region and  
275 varies according to the conformational stage of the HIV-1 envelope. That DH677.3 was  
276 better than A32 at mediating ADCC against HIV-1 clade B and C CD4 down-modulated  
277 cells (**Fig 5**) make this antibody an attractive candidate for targeting HIV-1 infected cells  
278 *in vivo* in the setting of HIV-1 infection. We have previously shown that the C1C2  
279 antibody A32 when formulated as a bi-specific antibody can potently opsonize and kill  
280 HIV-1 infected CD4+ T cells [29]. Whether DH677.3-type of antibodies are superior to  
281 A32 for targeting virus-infected cells remains to be determined.

282 In summary, our data demonstrate that if the RV144 vaccine trial had been  
283 boosted, ADCC-mediating antibodies would have undergone affinity maturation for both  
284 ADCC potency and breadth of recognition of HIV-1-infected CD4+ T cells. Rationally  
285 designed subsequent boosting strategies to immunofocus IgG C1C2-specific response  
286 towards DH677-like antibody specificities may be one method by which to provide  
287 greater protection than observed in the RV144 HIV-1 vaccine trial.

## 288 **METHODS**

289 ***Ethics Statement.*** The RV305 clinical trial (NCT01435135) was a boost given to  
290 162 RV144 clinical trial participants (NCT00223080) six-eight years after the conclusion  
291 of RV144 [30]. Donors used in this study were from groups boosted either with  
292 AIDSVAX B/E + ALVAC-HIV (vCP1521) (Group I) or AIDSVAX B/E alone (Group II).  
293 The RV305 clinical trial (NCT01435135) received approvals from Walter Reed Army  
294 Institute of Research, Thai Ministry of Public Health, Royal Thai Army Medical  
295 Department, Faculty of Tropical Medicine, Mahidol University, Chulalongkorn University  
296 Faculty of Medicine, and Siriraj Hospital. Written informed consent was obtained from all  
297 clinical trial participants. The Duke University Health System Institutional Review Board  
298 approved all human specimen handling.

299 ***Antigen-specific single-cell sorting.***  $1 \times 10^7$  peripheral blood mononuclear  
300 cells (PBMCs) per vaccine-recipient were stained with AE.A244gp120 $\Delta$ 11 fluorescently  
301 labelled proteins and a human B cell flow cytometry panel. Viable antigen-specific B  
302 cells (AqVd- CD14- CD16- CD3- CD19+ IgD-) were single-cell sorted with a BD  
303 FACS Aria II- SORP (BD Biosciences, Mountain View, CA) into 96 well PCR plates and  
304 stored at -80°C for RT-PCR.

305           **Single-cell reverse transcriptase PCR.** Single B cell cDNA was generated with  
306 random hexamers using SSIII. The antibody variable heavy and light chain variable  
307 regions were PCR amplified using AmpliTaq360 Master Mix (Applied Biosystems). PCR  
308 products were purified (Qiagen, Valencia, CA) and sequenced by Genewiz. Gene  
309 rearrangements, clonal relatedness, unmutated common ancestors and intermediate  
310 ancestor inferences were made using Cloanlyst [31]. DH677 clonal lineage tree was  
311 generated using FigTree.

312           **Monoclonal antibody production.** PCR-amplified heavy and light chain gene  
313 sequences were transiently expressed as previously described [32]. Ig containing cell  
314 culture supernatants were used for ELISA binding assays. For large scale expression,  
315 V<sub>H</sub> and V<sub>L</sub> chain genes were synthesized (V<sub>H</sub> chain in the IgG1 4A backbone) and  
316 transformed into DH5α cells (GeneScript, Piscataway, NJ). Plasmids were expressed in  
317 Luria Broth, purified (Qiagen, Valencia, CA) and Expi293 cells were transfected using  
318 ExpiFectamine™ (Life Technologies, Carlsbad, CA) following the manufacturers  
319 protocol. After five days of incubation at 37°C 5% CO<sub>2</sub> the Ig containing media was  
320 concentrated, purified with Protein A beads and the antibody buffer exchanged into  
321 PBS.

322           **Antibody binding and blocking assays.** Direct ELISAs were performed as  
323 previously described [32]. Briefly, 384-well microplates were coated overnight with  
324 30ng/well of protein. Antibodies were diluted and add for one hour. Binding was  
325 detected with an anti-IgG-HRP (Rockland) and developed with SureBlue Reserve TMB  
326 One Component (KPL). Plates were read on a plate reader (Molecular Devices) at

327 450nm. A32-blocking assays were performed by adding the RV305 antibodies followed  
328 by biotinylated A32 and detecting with streptavidin HRP.

329 **Neutralization assays.** TZM-bl neutralization assays were performed in the  
330 Montefiori lab as previously described [33]. Data are reported as IC<sub>50</sub> titers for  
331 antibodies.

332 **Infectious molecular clones (IMC).** The HIV-1 reporter virus used were  
333 replication-competent IMC designed to encode the *env* genes of CM235 (subtype A/E;  
334 GenBank No. AF259954.1), WITO (subtype B; GeneBank No. JN944948), 1086.c  
335 (subtype C; GeneBank No. FJ444395), TV-1 (subtype C; GeneBank No. HM215437),  
336 MW96.5 (subtype C; GeneBank No.), DU151 (subtype C; GeneBank No. DQ411851),  
337 DU422 (subtype C; GeneBank No. DQ411854) in *cis* within an Nef deficient isogenic  
338 backbone that expresses the *Renilla* luciferase reporter gene [34]. The subtype AE  
339 Env-IMC-LucR viruses used were the NL-LucR.T2A-AE.CM235-ecto (IMC<sub>CM235</sub>)  
340 (plasmid provided by Dr. Jerome Kim, US Military HIV Research Program), and clinical  
341 *env* isolates from the RV144 trial that were built on the 40061-LucR virus backbone. All  
342 the other IMCs were built using the original NL-LucR.T2A-ENV.ecto backbone as  
343 originally described by [35] Reporter virus stocks were generated by transfection of  
344 293T cells with proviral IMC plasmid DNA, and virus titer was determined on TZM-bl  
345 cells for quality control [35]

346 **Infection of CEM.NKR<sub>CCR5</sub> cell line with HIV-1 IMCs.** CEM.NKR<sub>CCR5</sub> cells were  
347 infected with HIV-1 IMCs as previously described [36]. Briefly, IMCs were titrated in  
348 order to achieve maximum expression within 48-72 hours post-infection as determined  
349 by detection of Luciferase activity and intra-cellular p24 expression. IMC infections

350 were performed by incubation of the optimal dilution of virus with CEM.NKR<sub>CCR5</sub> cells for  
351 0.5 hour at 37°C and 5% CO<sub>2</sub> in presence of DEAE-Dextran (7.5 µg/ml). The cells were  
352 subsequently resuspended at 0.5x10<sup>6</sup>/ml and cultured for 48-72 hours in complete  
353 medium containing 7.5µg/ml DEAE-Dextran. For each ADCC assay, we monitored the  
354 frequency infected target cells by intracellular p24 staining. Assays performed using  
355 infected target cells were considered reliable if cell viability was ≥60% and the  
356 percentage of viable p24<sup>+</sup> target cells on assay day was ≥20%.

357 ***Luciferase ADCC Assay.*** ADCC activity was determined by a luciferase (Luc)-  
358 based assay as previously described [8, 37] Briefly, CEM.NKR<sub>CCR5</sub> cells (NIH AIDS  
359 Reagent Program, Division of AIDS, NIAID, NIH from Dr. Alexandra Trkola) [38] were  
360 used as targets after infection with the HIV-1 IMCs. PBMC obtained from a HIV-  
361 seronegative donor with the heterozygous 158F/V and 131H/R genotypes for Fc<sub>γ</sub>R3A  
362 and Fc<sub>γ</sub>R2A [39, 40], respectively, were used as a source of effector cells, and were  
363 used at an effector to target ratio of 30:1. Recombinant mAbs were tested across a  
364 range of concentrations using 5-fold serial dilutions starting at 50 µg/mL. The effector  
365 cells, target cells, and Ab dilutions were plated in opaque 96-well half area plates and  
366 were incubated for 6 hours at 37°C in 5% CO<sub>2</sub>. The final read-out was the luminescence  
367 intensity (relative light units, RLU) generated by the presence of residual intact target  
368 cells that have not been lysed by the effector population in the presence of ADCC-  
369 mediating mAb (ViviRen substrate, Promega, Madison, WI). The % of specific killing  
370 was calculated using the formula: percent specific killing = [(number of RLU of target  
371 and effector well – number of RLU of test well)/number of RLU of target and effector  
372 well] ×100. In this analysis, the RLU of the target plus effector wells represents



373 spontaneous lysis in absence of any source of Ab. The ADCC endpoint concentration  
374 (EC), defined as the lowest concentration of mAb capable of mediating ADCC in our in  
375 vitro assay, was calculated by interpolation of the mAb concentration that intersected  
376 the positive cutoff of 15% specific killing. The RSV-specific mAb Palivizumab was used  
377 as a negative control.

378 **ADCC Score.** Antibodies were tested across a range of concentrations using 5-fold serial  
379 dilutions starting at 50 µg/mL. Since the dilution curves are not monotonic due to pro-  
380 zone effect of mAbs, non-parametric area under the curve (AUC) was calculated using  
381 trapezoidal rule with activity less than 15% set to 0 %. For calculating a weighted average  
382 to obtain a score for ADCC activity explaining both potency and breadth of the mAbs, in  
383 this study we have used Principal Component Analysis (PCA) to compute an ADCC  
384 score. PCA is the most commonly used method to reduce the dimensionality of the data  
385 set [41]. It uses Eigen vector decomposition of the correlation matrix of the variables,  
386 where each variable is represented by a viral isolate. Most of the shared variance of the  
387 correlations of ADCC AUC is explained by first principal component (PC1) [42]. Ideally,  
388 one would want to explain 70% of the variance but should not be at the expense of adding  
389 principal components with an Eigenvalue less than 1 [43].

390 In this study we a panel of 7 HIV isolates was tested which implies that our data set has  
391 seven dimensions. ADCC activity was measured as AUC . In our analysis PC1 and PC2  
392 have Eigen values above 1 and together account for 80.57% variance (**Table S5**). Scores  
393 obtained from the first Principal Component can be interpreted as weighted average of  
394 the 7 isolates that would account for both potency as well as breadth of the mAbs [43].  
395 Higher PC1 score would mean that mAb has a higher breadth as well as potency for

396 ADCC activity. To calculate the ADCC score, the standardized AUC value for each  
397 monoclonal antibody is calculated for each viral isolate, multiplied by factor loading of the  
398 given viral isolate and then these products are added together. Standardized AUC values  
399 imply zero mean and unit standard deviation. The AUC values below the value of mean  
400 AUC will result in negative PC1 scores.

401 ***Infection of primary cells with HIV-1 IMCs.*** Infectious molecular clones  
402 encoding the full-length transmitted/founder sequence of seven individuals infected with  
403 either subtype B or C viruses from the CHAVI acute infection cohort (CH77, CH264,  
404 CH0470, CH042, CH185, CH162 and CH236) were constructed as previously described  
405 [44, 45] and used to infect primary CD4+ cells. To infect cells, cryopreserved peripheral  
406 blood mononuclear cells (PBMCs) were thawed and stimulated in R20 media (RPMI  
407 media (Invitrogen) with 20% Fetal Bovine Serum (Gemini Bioproducts), 2mM L-  
408 glutamine (Invitrogen), 50 U /mL penicillin (Invitrogen), and 50 µg/mL Gentamicin  
409 (Invitrogen)) supplemented with IL-2 (30U/mL, Proleukin), anti-CD3 (25ng/mL clone  
410 OKT-3, Invitrogen) and anti-CD28 (25ng/mL, BD Biosciences) antibodies for 72 hours at  
411 37°C in 5% CO<sub>2</sub>. CD8 cells were depleted from the PBMCs using CD8 microbeads  
412 (Miltenyi Biotec, Germany) according to the Manufacturer's instructions and 1.5 x 10<sup>6</sup>  
413 cells were infected using 1 mL virus supernatant by spinoculation (1125 x g) for 2 hours  
414 at 20 °C. After spinoculation, 2 mL of R20 supplemented with IL-2 was added to each  
415 infection and infections were left for 72 hours. Infected cells were used if viability was  
416 >70% and more than 5% of cells were p24+.

417 **Infected Cell Elimination Assay.** HIV-1-infected or mock-infected CD8-depleted

418 PBMCs cells were used as targets and autologous cryo-preserved PBMCs rested  
419 overnight in R10 supplemented with 10ng/ml of IL-15 (Miltenyi Biotec) were used as a  
420 source of effector cells. Infected and uninfected target cells were labelled with a  
421 fluorescent target-cell marker (TFL4; OncoImmunin) and a viability marker (NFL1;  
422 OncoImmunin) for 15 min at 37 °C, as specified by manufacturer. The labeling of the  
423 target cells with these two markers allowed to clearly identify only the live viable cells in  
424 our gating strategy and exclude artifacts related to the presence of dead cells staining.  
425 Cells were washed in R10 and adjusted to a concentration of  $0.2 \times 10^6$  cells/mL. PBMCs  
426 were then added to target cells at an effector/target ratio of 30:1 ( $6 \times 10^6$  cells/mL). The  
427 target/effector cell suspension was plated in V-bottom 96-well plates and co-cultured  
428 with 10 µg/mL of each mAb. Co-cultures were incubated for 6 h at 37 °C in 5% CO<sub>2</sub>.  
429 After the incubation period, cells were washed and stained with anti-CD4-PerCP-Cy5.5  
430 (eBioscience, clone OKT4) at a final dilution of 1:40 in the dark for 20 min at room  
431 temperature (RT). Cells were then washed, resuspended in 100 µL/well  
432 Cytofix/Cytoperm (BD Biosciences), incubated in the dark for 20 min at 4 °C, washed in  
433 1x Cytoperm wash solution (BD Biosciences) and co-incubated with anti-p24 antibody  
434 (clone KC57-RD1; Beckman Coulter) to a final dilution of 1:100, and incubated in the  
435 dark for 25 min at 4 °C. Cells were washed three times with Cytoperm wash solution  
436 and resuspended in 125 µL PBS-1% paraformaldehyde. The samples were acquired  
437 within 24 h using a BD Fortessa cytometer. The appropriate compensation beads were  
438 used to compensate the spill over signal for the four fluorophores. Data analysis was  
439 performed using FlowJo 9.6.6 software (TreeStar). Mock-infected cells were used to  
440 appropriately position live cell p24<sup>+/-</sup> and CD4<sup>+/-</sup> gates.

441 Specific killing was determined by the reduction in % of viable p24+ cells in the  
442 presence of mAbs after taking into consideration non-specific killing, and was calculated  
443 as:

$$444 \frac{\text{p24\% (target + effector cells)} - \text{p24\% (targets + effectors + mAb/plasma)}}{\text{p24\% (target + effector cells)}}$$

445 CH65 (an anti-influenza monoclonal antibody, kindly provided by Dr. Moody) was used  
446 as negative control. To remove background signal, the highest value of percent specific  
447 killing induced by CH65 was subtracted from the calculated reduction in % of p24+ cells  
448 and then negative values were rounded to 0%.

449 **Surface plasmon resonance** – The binding and kinetic rates measurement of gp120  
450 proteins against RV305 mAbs were obtained by surface plasmon resonance (SPR)  
451 using the Biacore 3000 instrument (GE Healthcare). SPR measurements were  
452 performed using a CM5 sensor chip with anti-human IgG Fc antibody directly  
453 immobilized to a level of 9000-11000RU (response unit). Antibodies were then  
454 captured at 5ul/min for 60s to a level of 100-300RU. For binding analyses, the gp120  
455 proteins were diluted to approximately 1000nM in PBS and injected over the captured  
456 antibodies for 3 minutes at 30ul/min. For kinetics measurements, the gp120 proteins  
457 were diluted from 5-750nM and injected using a high performance kinetics injection for 5  
458 minutes at 50uL/min. This was followed by a dissociation period of 600s and surface  
459 regeneration with Glycine pH2.0 for 20s. Results were analyzed using the Biacore  
460 BiaEvaluation Software (GE Healthcare). Negative control antibody (Ab82) and blank  
461 buffer binding were used for double reference subtraction to account for non-specific  
462 protein binding and signal drift. Subsequent curve fitting analysis was performed using a

463 1:1 Langmuir model with a local Rmax and the reported rate constants are  
464 representative of two measurements.

465 ***Protein preparation and complex crystallization*** DH677.3 Fab alone was grown and  
466 crystallized at concentration ~10 mg/ml. The structure was solved by molecular  
467 replacement with PDB ID 3QEG in space group P2<sub>1</sub> to a resolution of 2.6 Å. Clade A/E  
468 93TH057 gp120 core<sub>e</sub>, (gp120<sub>93TH057</sub> core<sub>e</sub>, residues 42-492 (Hxbc2 numbering)), lacking  
469 the V1, V2 and V3 variable loops and containing a H375S mutation to allow binding of  
470 the CD4 mimetic M48U1 [46] was used to obtain crystals of DH677.3 Fab-antigen  
471 complex. gp120<sub>93TH057</sub> core<sub>e</sub> was prepared and purified as described in [3].  
472 Deglycosylated gp120<sub>93TH057</sub> core<sub>e</sub> was first mixed with CD4 mimetic peptide M48U1 at a  
473 molar ratio of 1:1.5 and purified through gel filtration chromatography using a Superdex  
474 200 16/60 column (GE Healthcare, Piscataway, NJ). After concentration, the gp120<sub>93TH057</sub>  
475 core<sub>e</sub>-M48U1 complex was mixed with a 20% molar excess of DH677.3 Fab and passed  
476 again through the gel filtration column equilibrated with 5 mM Tris-HCl buffer pH 7.2 and  
477 100 mM ammonium acetate. The purified complex was concentrated to ~10 mg/ml for  
478 crystallization experiments. The structure was solved by molecular replacement using  
479 the DH677.3 Fab and PDB ID 3TGT as searching models in space group P1 to a  
480 resolution 3.0 Å. The final R<sub>factor</sub>/R<sub>free</sub> (%) for the Fab structure is 19.9/26.1 and the final  
481 R<sub>factor</sub>/R<sub>free</sub> for the complex is 21.4/27.4 (**Table S3**). The PDB IDs for the deposited  
482 structures are 6MFJ and 6MFP respectively. In each case the asymmetric unit of the  
483 crystal contained two almost identical copies of Fab or the Fab- gp120<sub>93TH057</sub> core<sub>e</sub>  
484 complex (**Fig S2**)

485 **Crystallization and Data collection** Initial crystal screens were done in vapor-diffusion  
486 hanging drop trials using commercially available sparse matrix crystallization screens  
487 from Hampton Research (Index), Emerald BioSystems (Precipitant Wizard Screen) and  
488 Molecular Dimensions (Proplex and Macrosol Screens). The screens were monitored  
489 periodically for protein crystals. Conditions that produced crystals were then further  
490 optimized to produce crystals suitable for data collection. DH677.3 Fab crystals were  
491 grown from 20% PEG 3000, 100 mM HEPES pH 7.5, and 200 mM sodium chloride.  
492 DH677.3 complex crystals were grown from 25% PEG 4000 and 100 mM MES pH 5.5.  
493 Crystals were briefly soaked in crystallization solution plus 20% MPD before being flash  
494 frozen in liquid nitrogen prior to data collection.

495 **Data collection and structure solution** Diffraction data were collected at the Stanford  
496 Synchrotron Radiation Light Source (SSRL) at beam line BL12-2 equipped with a Dectris  
497 Pilatus area detector. All data were processed and reduced with HKL2000 [47].  
498 Structures were solved by molecular replacement with Phaser [48] from the CCP4 suite  
499 [49]. The DH677.3 Fab structure was solved based on the coordinates of the N12-i2 Fab  
500 (PDB: 3QEG), and the DH677.3 complex was then solved with coordinates from the  
501 DH677.3 Fab model, gp120 (PDB: 3TGT), and M48U1 (PDB: 4JZW). Refinement was  
502 carried out with Refmac [50] and/or Phenix [51]. Refinement was coupled with manual  
503 refitting and rebuilding with COOT [52]. Data collection and refinement statistics are  
504 shown in **Table 1**.

505 **Structure validation and analysis** The quality of the final refined models was  
506 monitored using the program MolProbity [53]. Structural alignments were performed  
507 using the program lsqkab from the CCP4 suite [49]. The PISA [54] webserver was used

508 to determine contact surfaces and residues. All illustrations were prepared with the  
509 PyMol Molecular Graphic suite (<http://pymol.org>) (DeLano Scientific, San Carlos, CA,  
510 USA). Conservation of the DH677.3 epitope was calculated using the HIV Sequence  
511 Database Compendium  
512 (<https://www.hiv.lanl.gov/content/sequence/HIV/COMPENDIUM/compendium.html>)  
513 comparing gp120 residues relative to Clade B Hxhc2. Only unique sequences in the  
514 database having an equivalent residue at each position were included in the calculated  
515 percentage representing approximately 32,000 sequences on average.

516 **Statistical Methods** For luciferase based ADCC assay background correction was  
517 performed by subtracting the highest value of percent specific killing induced by CH65  
518 and then rounding off the negative values to zero. In order to assess if two groups have  
519 different response pairwise comparisons between groups was conducted using  
520 Wilcoxon rank sum test. Statistical analysis was performed using SAS software (SAS  
521 Institute Inc., Cary, N.C.).

522

## 523 **FIGURE LEGENDS**

524 **Figure 1. Identification of RV305 C1C2-specific antibodies.** (A) The C1C2-specific  
525 antibodies A32 or C11 were assayed by direct binding ELISA for reactivity with full  
526 length AE.A244gp120 or AE.A244g120 $\Delta$ 11. An A32-specific mutant protein was  
527 designed (AE.A244g120 $\Delta$ 11 F35S H72L V75A E106K D107H S110A Q114L) to identify  
528 A32-like antibody responses. 19B antibody was used as a positive control and CH65 as  
529 a negative control. (B) RV305 non-neutralizing antibodies were assayed for A32-  
530 blocking by ELISA. (C) RV305 non-neutralizing A32-blockable antibody heavy and light

531 chain gene sequence mutation frequencies were analyzed by Cloanalyst (Kepler et al.,  
532 2014) and compared to previously published RV144 heavy and light chain gene  
533 sequence mutation frequencies (% nucleotide) (Bonsignori et al., 2012). Statistical  
534 significance was determined using a Wilcoxon rank sum test. Red bar represents that  
535 mean (D) RV305 non-neutralizing A32-blockable antibody were assayed by direct  
536 binding ELISA to AE.A244g120Δ11 and AE.A244g120Δ11 F35S H72L V75A E106K  
537 D107H S110A Q114L. Data are expressed as % binding the mutant protein relative to  
538 WT. Shown are the mean with standard deviation of two independent experiments.

539 **Figure 2. RV305 boosting increased the apparent affinity and antibody dependent**  
540 **cellular cytotoxicity breadth and potency of the C1C2-specific RV144 derived**  
541 **DH677 memory B cell clonal lineage.** DH677.1 antibody was isolated by antigen-  
542 specific single-cell sorting PBMC from the RV144 vaccine trial. DH677.2, DH677.3 and  
543 DH677.4 were isolated by antigen-specific single-cell sorting PBMC collected after the  
544 second boost AIDSVAX B/E (RV305 Group II) given in RV305 (~7yrs later). The  
545 intermediate ancestors and unmutated common ancestor was inferred using Clonalyst  
546 [31]. Recombinantly expressed antibodies were assayed by biolayer interferometry for  
547 binding to the AIDSVAX B/E proteins - AE.A244g120Δ11 + B.MNg120Δ11- and for  
548 antibody dependent cellular cytotoxicity (ADCC) against AE.C235, B.WITO, C.TV-1,  
549 C.MW965, C.1086C, C.DU151 and C.DU422 Renilla luciferase reporter gene infectious  
550 molecular clone infected cells. An ADCC score (see methods) was used to account for  
551 breadth and potency.

552 **Figure 3. Crystal structure of the DH677.3 Fab-gp120<sub>93TH057</sub> core<sub>e</sub>-M48U1 complex.**  
553 (A) The overall structure of the complex is shown as a ribbon diagram (left) and with the



554 molecular surface displayed over the Fab molecule (middle), colored based on  
555 electrostatic charge, red negative and blue positive. The gp120 outer domain is gray  
556 and inner domain colored to indicate inner domain mobile layer 1 (yellow), 2 (cyan), 3  
557 (light orange) and the 7-stranded b-sandwich (magenta). Complementary determining  
558 regions (CDRs) are colored: CDR H1 (light blue), CDR H2 (dark green), CDR H3  
559 (black), CRL1 (light green), CDR L2 (blue) and CDRL3 (brown). A blow-up view shows  
560 the network of hydrogen (H) bonds formed at the Fab-gp120 interface. H-bonds  
561 contributed by side chain and main chain atoms of gp120 residues are colored in  
562 magenta and blue, respectively. **(B)** Antibody buried surface area (BSA) and gp120  
563 residues forming DH677.3 epitope are shaded in blue according to BSA (antibody) and  
564 percent conservation of gp120 residues (Env). gp120 main chain (blue) and side chain  
565 (red) hydrogen bonds (H) and salt bridges (S) are shown above the residue. **(C)** The  
566 DH677.3 Fab-gp120<sub>93TH057</sub> core<sub>e</sub> interface. CDRs are shown as ribbons (left) and balls-  
567 and-sticks of residues contributing the binding (right) over the gp120 core. The  
568 molecular surface of gp120 is colored as in **(A)** (left) and by electrostatic potential  
569 (right).

570 **Figure 4. Recognition of HIV-1 Env by DH677.3 and other Cluster A antibodies. (A)**

571 The overlay of DH677.3 and Cluster A antibodies A32 and N12-i3 (C11-like) bound to  
572 the gp120 core. Crystals structures of the gp120 antigen in complex with the Fab of  
573 DH677.3, A32 (PDB code 4YC2) and N12-i3 (PDB code 5W4L) were superimposed  
574 based on gp120. The d1 and d2 domains of the target cell receptor CD4 was added to  
575 replace peptide mimetic M48U1 of the DH677.3 Fab-gp120<sub>93TH057</sub> core<sub>e</sub>-M48U1  
576 complex. Molecular surfaces are displayed over Fab molecules and colored in lighter

577 and darker shades of brown, blue and green for the heavy and light chains of DH677.3,  
578 A32 and N12-i3, respectively. A blow up view shows details of the DH677.3 interaction  
579 with the 8-stranded  $\beta$ -sandwich of the gp120 inner domain. The 8<sup>th</sup> strand (colored in  
580 blue) formed by the 11 N-terminal residues of gp120 in the N12-i3 bound conformation  
581 (PDB: 5W4L) was modeled into the DH677.3 Fab-gp120<sub>93TH057</sub> core<sub>e</sub>-M48U1 complex.  
582 CHR H1 and 2 of DH677.3 are colored light blue and dark green, respectively. **(B)** and  
583 **(C)** Comparison of DH677.3, A32 and N12-i3 epitope footprints. In **(B)** the DH677.3  
584 epitope footprint (shown in red) is plotted on the gp120 surface with layers colored as in  
585 Figure 1 with the A32 and N12-i2 epitope footprints shown in black. In **(C)** the DH677.3,  
586 A32 and N12-i3 gp120 contact residues are mapped onto the gp120 sequence. Side  
587 chain (+) and main chain (-) contact residues are colored green for hydrophobic, blue for  
588 hydrophilic and black for both as determined by a 5 Å cut off value over the  
589 corresponding sequence. Buried surface residues as determined by PISA are shaded.  
590 The DH677.3 epitope footprint overlays with the epitopes of both A32 and N12-i3.

591 **Figure 5. RV305 derived C1C2-specific antibody DH677.3 is significantly better**  
592 **than A32 at mediating antibody-dependent cellular cytotoxicity against CD4 down**  
593 **modulated infectious molecular clone infected cells.** Cells were infected with clade  
594 B and clade C full length infectious molecular clones (IMC) that do not contain a  
595 reporter gene. Surface CD4 expression was analyzed by flow cytometry and p24  
596 expression was measured in live/viable (A) all p24+ (B) p24+ CD4+ and (C) p24+ CD4-  
597 IMC infected cell populations. Data are shown with the mean and standard deviation.

598 **Table1: Ranking C1C2-specific antibodies by ADCC breadth and potency.** RV305  
599 and RV144 C1C2-specific antibodies were assayed for antibody-dependent cellular

600 cytotoxicity against AE.CM235, B.WITO, C.TV-1, C.MW965, C.1086C, C.DU151 and  
601 C.DU422 infectious molecular clone infected cells. Antibodies were ranked using an  
602 ADCC Score that accounts for breadth and potency (see methods). Number of strains  
603 recognized was determined by ADCC endpoint concentration > 40µg/mL.

604 **Figure S1. RV305 C1C2-specific antibody ADCC score inversely correlate with**  
605 **antibody mutation frequency.** Correlation between RV305 antibody heavy chain  
606 gene mutation frequency (% nucleotide; Cloanlyst) [31] and ADCC score (see  
607 methods) was calculated with SAS (Spearman Correlation = -0.5599; p value = 0.0127).

608 **Figure S2. RV305 boosting increased affinity of the C1C2-specific RV144 derived**  
609 **DH677 memory B cell clonal lineage to the AIDSVAX B/E proteins.** DH677.1  
610 antibody was isolated by antigen-specific single-cell sorting PBMC from the RV144  
611 vaccine trial. DH677.2, DH677.3 and DH677.4 were isolated by antigen-specific single-  
612 cell sorting PBMC collected after the second boost AIDSVAX B/E (RV305 Group II)  
613 given in RV305 (~7yrs later). The intermediate ancestors and unmutated common  
614 ancestor was inferred using Clonalayst [31]. Recombinantly expressed antibodies were  
615 assayed by surface plasmon resonance for binding to the AIDSVAX B/E proteins -  
616 AE.A244g120Δ11 + B.MNg120Δ11- and to full length AE.A244gp120.

617 **Figure S3. Boosting in RV305 increased DH677 B cell clonal lineage cross-clade**  
618 **antibody-dependent cellular cytotoxicity breadth and potency.** Recombinantly  
619 expressed DH677 clonal lineage members were assayed for antibody-dependent  
620 cellular cytotoxicity (ADCC) against AE.CM235, B.WITO, C.TV-1, C.MW965, C.1086C,  
621 C.DU151 and C.DU422 Renilla luciferase reporter gene infectious molecular clone

622 infected cells. Data are shown as radar plots with an ADCC score (see methods) that  
623 accounts for ADCC breadth and potency.

624 **Figure S4. Comparison of the two copies of the DH677.3 Fab-gp120<sub>93TH057</sub> core-**  
625 **M48U1 complex and the two Fab copies in the apo Fab structure from the**  
626 **asymmetric unit of crystals. (A)** The root mean square deviation (RMSD) between  
627 complex copies is 0.946 Å for main chain residues. **(B)** The RMSD between the Fab  
628 copies in the apo Fab structure is 0.540 Å for main chain residues. **(C)** Comparison of  
629 the free and bound DH677.3 Fab. The  $\alpha$ -carbon backbone diagram of superposition of  
630 the structures of DH677.3 Fab alone (dark cyan-heavy chain and light cyan-light chain)  
631 and N5-i5 Fab bound to CD4-triggered gp120 (dark brown-heavy chain and light brown-  
632 light chain). The average RMSD between free and bound Fabs is 0.818 Å for main  
633 chain residues.

634 **Figure S5. Antibody contact residues.** mAb side chain (+) and main chain (-) contact  
635 residues colored green for hydrophobic, blue for hydrophilic and black for both as  
636 determined by a 5 Å cut off value over the corresponding sequence. CDRs are colored  
637 as in Figure 1 and buried surface residues as determined by PISA are shaded.

638 **Table S1. Immunogenetics of non-neutralizing A32-blocking RV305 C1C2-specific**  
639 **antibodies.** RT-PCR amplified variable heavy and variable light chain genes were  
640 Sanger sequenced (Genewiz) and analyzed with Cloanalyst [31].

641 **Table S2. A32-blocking antibodies do not neutralize HIV-1.** (A) Recombinantly  
642 expressed antibodies were assayed in the TZM-bl neutralization assay against

643 autologous and heterologous Tier 1 and Tier 2 isolates. No neutralization was detected.  
644 Data are shown as EC50 ( $\mu\text{g}/\text{mL}$ )

645 **Table S3. DH677.3 structural data collection and refinement statistics**

646 **Table S4. Details of the DH677.3, A32, and N12-i3 interfaces based on the**  
647 **DH677.3-gp120<sub>93TH057</sub>core<sub>e</sub>-M48U1, A32 Fab-ID2<sub>93TH057</sub>, and N12-i3 Fab-**  
648 **gp120<sub>93TH057</sub>core<sub>e</sub>+N/C-M48U1 structures** as calculated by the EBI PISA server  
649 ([http://www.ebi.ac.uk/msd-srv/prot\\_int/cgi-bin/piserver](http://www.ebi.ac.uk/msd-srv/prot_int/cgi-bin/piserver)). The two copies in the  
650 asymmetric unit of the DH677.3, A32, and N12-i3 complexes are averaged in the table.

651

## 652 **ACKNOWLEDGEMENTS**

653 The authors would like to acknowledge the Duke Human Vaccine Institute Flow  
654 Cytometry Facility (Durham, NC), Duke Human Vaccine Institute Viral Genetic Analysis  
655 Facility (Durham, NC) and the following individuals for their expert technical assistance:  
656 flow cytometry – Derek Cain, Patrice McDermott and Dawn Jones Marshall, conjugated  
657 antigens – Lawrence Armand, transient transfections – Andrew Foulger, Erika Dunford  
658 and Kedamawit Tilahun, ELISA – Rob Parks, Callie Vivian and Maggie Barr, Antibody  
659 Expression - Giovanna Hernandez, Esther Lee, Emily Machiele and Rachel Reed,  
660 Neutralization Assays – Amanda Eaton, Celia C. LeBranche, Peter Gao, Kelli Greene  
661 and Hongmei Gao, Biolayer Interferometry – Kara Anasti. From project management –  
662 Cynthia Nagle and Kelly Soderberg. We also thank all of the RV144 and RV305 clinical  
663 trial team members and participants. This work was primarily supported by a  
664 Collaboration for AIDS Vaccine Discovery Grant OPP1114721 from the Bill & Melinda

665 Gates Foundation to BFH, and by NIH grants NIAID R01 AI116274 and R01 AI129769  
666 to MP, NIAID P01 AI120756 to GT, and a Henry M. Jackson Foundation for the  
667 Advancement of Military Medicine #829295 grant to BFH.

#### 668 **AUTHOR CONTRIBUTION**

669 Conceptualization, D.E., B.F.H., J.P., M.P., G.F.; Methodology, D.E., B.F.H., J.P., G.F.;  
670 Software, K.W., T.B.K.; Validation, D.E., J.P., S.J., M.P., G.F.; Formal Analysis, S.J.,  
671 K.W.; Investigation, D.E., J.P., K.L., W.D.T., B.Y., D.M.; Resources, R.J.O., S.V., J.K.,  
672 K.K., P.P., S.N., F.S., J.T., S.P.; Data Curation, D.E., J.P., K.W., D.M., S.J., S.M.A.,  
673 D.C.M., M.P., G.F. ; Writing – Original Draft, D.E., S.J., M.P., G.F.; Writing – Review &  
674 Editing, D.E., J.P., W.D.T., B.Y., S.J., S.V., S.P., G.D.T., M.A.M., M.P., B.F.H., G.F.;  
675 Visualization, D.E., J.P., S.J., G.F.; Supervision, D.E., J.P., W.D.T., K.O.S., D.C.M.,  
676 M.P., B.F.H., G.F.; Project Administration; D.E., M.P., G.F., B.F.H.; Funding Acquisition,  
677 M.P., G.D.T., B.F.H., G.F.

678

#### 679 **DECLARATION OF INTEREST**

680

681 B.F.H., G.F. and D.E. have patents submitted on antibodies listed in this paper.

682

#### 683 **DISCLAIMER**

684

685 The views expressed are those of the authors and should not be construed to represent  
686 the positions of the Uniformed Services University, U.S. Army, Department of Defense  
687 or the Department of Health and Human Services. The investigators have adhered to  
688 the policies for protection of human subjects as prescribed in AR-70.

689

## 690 REFERENCES

- 691 1. Guan Y, Pazgier M, Sajadi MM, Kamin-Lewis R, Al-Darmarki S, Flinko R, et al. Diverse specificity  
692 and effector function among human antibodies to HIV-1 envelope glycoprotein epitopes exposed by CD4  
693 binding. *Proceedings of the National Academy of Sciences of the United States of America*.  
694 2013;110(1):E69-78. doi: 10.1073/pnas.1217609110. PubMed PMID: 23237851; PubMed Central PMCID:  
695 PMC3538257.
- 696 2. Ferrari G, Pollara J, Kozink D, Harms T, Drinker M, Freel S, et al. An HIV-1 gp120 envelope human  
697 monoclonal antibody that recognizes a C1 conformational epitope mediates potent antibody-dependent  
698 cellular cytotoxicity (ADCC) activity and defines a common ADCC epitope in human HIV-1 serum. *Journal*  
699 *of virology*. 2011;85(14):7029-36. doi: 10.1128/JVI.00171-11. PubMed PMID: 21543485; PubMed  
700 Central PMCID: PMC3126567.
- 701 3. Acharya P, Tolbert WD, Gohain N, Wu X, Yu L, Liu T, et al. Structural definition of an antibody-  
702 dependent cellular cytotoxicity response implicated in reduced risk for HIV-1 infection. *Journal of*  
703 *virology*. 2014;88(21):12895-906. doi: 10.1128/JVI.02194-14. PubMed PMID: 25165110; PubMed Central  
704 PMCID: PMC4248932.
- 705 4. Tolbert WD, Gohain N, Veillette M, Chapleau JP, Orlandi C, Visciano ML, et al. Paring Down HIV  
706 Env: Design and Crystal Structure of a Stabilized Inner Domain of HIV-1 gp120 Displaying a Major ADCC  
707 Target of the A32 Region. *Structure*. 2016;24(5):697-709. doi: 10.1016/j.str.2016.03.005. PubMed PMID:  
708 27041594; PubMed Central PMCID: PMC4856543.
- 709 5. Gohain N, Tolbert WD, Acharya P, Yu L, Liu T, Zhao P, et al. Cocrystal Structures of Antibody N60-  
710 i3 and Antibody JR4 in Complex with gp120 Define More Cluster A Epitopes Involved in Effective  
711 Antibody-Dependent Effector Function against HIV-1. *Journal of virology*. 2015;89(17):8840-54. doi:  
712 10.1128/JVI.01232-15. PubMed PMID: 26085162; PubMed Central PMCID: PMC4524080.
- 713 6. Tolbert WD, Gohain N, Alshahfi N, Van V, Orlandi C, Ding S, et al. Targeting the Late Stage of HIV-  
714 1 Entry for Antibody-Dependent Cellular Cytotoxicity: Structural Basis for Env Epitopes in the C11  
715 Region. *Structure*. 2017;25(11):1719-31 e4. doi: 10.1016/j.str.2017.09.009. PubMed PMID: 29056481;  
716 PubMed Central PMCID: PMC5677539.
- 717 7. Haynes BF, Gilbert PB, McElrath MJ, Zolla-Pazner S, Tomaras GD, Alam SM, et al. Immune-  
718 correlates analysis of an HIV-1 vaccine efficacy trial. *The New England journal of medicine*.  
719 2012;366(14):1275-86. doi: 10.1056/NEJMoa1113425. PubMed PMID: 22475592; PubMed Central  
720 PMCID: PMC3371689.
- 721 8. Pollara J, Bonsignori M, Moody MA, Liu P, Alam SM, Hwang KK, et al. HIV-1 vaccine-induced C1  
722 and V2 Env-specific antibodies synergize for increased antiviral activities. *Journal of virology*.  
723 2014;88(14):7715-26. doi: 10.1128/JVI.00156-14. PubMed PMID: 24807721; PubMed Central PMCID:  
724 PMC4097802.
- 725 9. Alam SM, Liao HX, Tomaras GD, Bonsignori M, Tsao CY, Hwang KK, et al. Antigenicity and  
726 immunogenicity of RV144 vaccine AIDSVAX clade E envelope immunogen is enhanced by a gp120 N-  
727 terminal deletion. *Journal of virology*. 2013;87(3):1554-68. doi: 10.1128/JVI.00718-12. PubMed PMID:  
728 23175357; PubMed Central PMCID: PMC3554162.
- 729 10. Pitisuttithum P, Rerks-Ngarm S, Bussaratid V, Dhitavat J, Maekanantawat W, Pungpak S, et al.  
730 Safety and reactogenicity of canarypox ALVAC-HIV (vCP1521) and HIV-1 gp120 AIDSVAX B/E vaccination  
731 in an efficacy trial in Thailand. *PloS one*. 2011;6(12):e27837. doi: 10.1371/journal.pone.0027837.  
732 PubMed PMID: 22205930; PubMed Central PMCID: PMC3244387.
- 733 11. Bonsignori M, Pollara J, Moody MA, Alpert MD, Chen X, Hwang KK, et al. Antibody-dependent  
734 cellular cytotoxicity-mediating antibodies from an HIV-1 vaccine efficacy trial target multiple epitopes

- 735 and preferentially use the VH1 gene family. *Journal of virology*. 2012;86(21):11521-32. doi:  
736 10.1128/JVI.01023-12. PubMed PMID: 22896626; PubMed Central PMCID: PMC3486290.
- 737 12. Wildum S, Schindler M, Munch J, Kirchhoff F. Contribution of Vpu, Env, and Nef to CD4 down-  
738 modulation and resistance of human immunodeficiency virus type 1-infected T cells to superinfection.  
739 *Journal of virology*. 2006;80(16):8047-59. doi: 10.1128/JVI.00252-06. PubMed PMID: 16873261;  
740 PubMed Central PMCID: PMC1563805.
- 741 13. Arganaraz ER, Schindler M, Kirchhoff F, Cortes MJ, Lama J. Enhanced CD4 down-modulation by  
742 late stage HIV-1 nef alleles is associated with increased Env incorporation and viral replication. *The*  
743 *Journal of biological chemistry*. 2003;278(36):33912-9. doi: 10.1074/jbc.M303679200. PubMed PMID:  
744 12816953.
- 745 14. Veillette M, Desormeaux A, Medjahed H, Gharsallah NE, Coutu M, Baalwa J, et al. Interaction  
746 with cellular CD4 exposes HIV-1 envelope epitopes targeted by antibody-dependent cell-mediated  
747 cytotoxicity. *Journal of virology*. 2014;88(5):2633-44. doi: 10.1128/JVI.03230-13. PubMed PMID:  
748 24352444; PubMed Central PMCID: PMC3958102.
- 749 15. Prevost J, Richard J, Medjahed H, Alexander A, Jones J, Kappes JC, et al. Incomplete  
750 Downregulation of CD4 Expression Affects HIV-1 Env Conformation and Antibody-Dependent Cellular  
751 Cytotoxicity Responses. *Journal of virology*. 2018;92(13). doi: 10.1128/JVI.00484-18. PubMed PMID:  
752 29669829; PubMed Central PMCID: PMC6002730.
- 753 16. Zoubchenok D, Veillette M, Prevost J, Sanders-Buell E, Wagh K, Korber B, et al. Histidine 375  
754 Modulates CD4 Binding in HIV-1 CRF01\_AE Envelope Glycoproteins. *Journal of virology*. 2017;91(4). doi:  
755 10.1128/JVI.02151-16. PubMed PMID: 27928014; PubMed Central PMCID: PMC5286895.
- 756 17. Prevost J, Zoubchenok D, Richard J, Veillette M, Pacheco B, Coutu M, et al. Influence of the  
757 Envelope gp120 Phe 43 Cavity on HIV-1 Sensitivity to Antibody-Dependent Cell-Mediated Cytotoxicity  
758 Responses. *Journal of virology*. 2017;91(7). doi: 10.1128/JVI.02452-16. PubMed PMID: 28100618;  
759 PubMed Central PMCID: PMC5355605.
- 760 18. Haynes BF, Kelsoe G, Harrison SC, Kepler TB. B-cell-lineage immunogen design in vaccine  
761 development with HIV-1 as a case study. *Nature biotechnology*. 2012;30(5):423-33. doi:  
762 10.1038/nbt.2197. PubMed PMID: 22565972; PubMed Central PMCID: PMC3512202.
- 763 19. Wiehe K, Bradley T, Meyerhoff RR, Hart C, Williams WB, Easterhoff D, et al. Functional Relevance  
764 of Improbable Antibody Mutations for HIV Broadly Neutralizing Antibody Development. *Cell host &*  
765 *microbe*. 2018;23(6):759-65 e6. doi: 10.1016/j.chom.2018.04.018. PubMed PMID: 29861171.
- 766 20. Chung AW, Ghebremichael M, Robinson H, Brown E, Choi I, Lane S, et al. Polyfunctional Fc-  
767 effector profiles mediated by IgG subclass selection distinguish RV144 and VAX003 vaccines. *Science*  
768 *translational medicine*. 2014;6(228):228ra38. doi: 10.1126/scitranslmed.3007736. PubMed PMID:  
769 24648341.
- 770 21. Karnasuta C, Akapirat S, Madnote S, Savadsuk H, Puangkaew J, Rittiroongrad S, et al.  
771 Comparison of Antibody Responses Induced by RV144, VAX003, and VAX004 Vaccination Regimens.  
772 *AIDS research and human retroviruses*. 2017;33(5):410-23. doi: 10.1089/AID.2016.0204. PubMed PMID:  
773 28006952; PubMed Central PMCID: PMC5439458.
- 774 22. Yates NL, Liao HX, Fong Y, deCamp A, Vandergrift NA, Williams WT, et al. Vaccine-induced Env  
775 V1-V2 IgG3 correlates with lower HIV-1 infection risk and declines soon after vaccination. *Science*  
776 *translational medicine*. 2014;6(228):228ra39. doi: 10.1126/scitranslmed.3007730. PubMed PMID:  
777 24648342; PubMed Central PMCID: PMC4116665.
- 778 23. Alsahafi N, Bakouche N, Kazemi M, Richard J, Ding S, Bhattacharyya S, et al. An Asymmetric  
779 Opening of HIV-1 Envelope Mediates Antibody-Dependent Cellular Cytotoxicity. *Cell host & microbe*.  
780 2019;25(4):578-87 e5. Epub 2019/04/12. doi: 10.1016/j.chom.2019.03.002. PubMed PMID: 30974085.
- 781 24. Ljunggren K, Moschese V, Broliden PA, Giaquinto C, Quinti I, Fenyo EM, et al. Antibodies  
782 mediating cellular cytotoxicity and neutralization correlate with a better clinical stage in children born to



- 783 human immunodeficiency virus-infected mothers. *The Journal of infectious diseases*. 1990;161(2):198-  
784 202. PubMed PMID: 2299204.
- 785 25. Nag P, Kim J, Sapiega V, Landay AL, Bremer JW, Mestecky J, et al. Women with cervicovaginal  
786 antibody-dependent cell-mediated cytotoxicity have lower genital HIV-1 RNA loads. *The Journal of*  
787 *infectious diseases*. 2004;190(11):1970-8. doi: 10.1086/425582. PubMed PMID: 15529262; PubMed  
788 Central PMCID: PMC3119045.
- 789 26. Lambotte O, Ferrari G, Moog C, Yates NL, Liao HX, Parks RJ, et al. Heterogeneous neutralizing  
790 antibody and antibody-dependent cell cytotoxicity responses in HIV-1 elite controllers. *Aids*.  
791 2009;23(8):897-906. doi: 10.1097/QAD.0b013e328329f97d. PubMed PMID: 19414990; PubMed Central  
792 PMCID: PMC3652655.
- 793 27. Baum LL, Cassutt KJ, Knigge K, Khattri R, Margolick J, Rinaldo C, et al. HIV-1 gp120-specific  
794 antibody-dependent cell-mediated cytotoxicity correlates with rate of disease progression. *Journal of*  
795 *immunology*. 1996;157(5):2168-73. PubMed PMID: 8757343.
- 796 28. Lambotte O, Pollara J, Boufassa F, Moog C, Venet A, Haynes BF, et al. High antibody-dependent  
797 cellular cytotoxicity responses are correlated with strong CD8 T cell viral suppressive activity but not  
798 with B57 status in HIV-1 elite controllers. *PloS one*. 2013;8(9):e74855. doi:  
799 10.1371/journal.pone.0074855. PubMed PMID: 24086385; PubMed Central PMCID: PMC3781132.
- 800 29. Sung JA, Pickeral J, Liu L, Stanfield-Oakley SA, Lam CY, Garrido C, et al. Dual-Affinity Re-Targeting  
801 proteins direct T cell-mediated cytolysis of latently HIV-infected cells. *The Journal of clinical*  
802 *investigation*. 2015;125(11):4077-90. doi: 10.1172/JCI82314. PubMed PMID: 26413868; PubMed Central  
803 PMCID: PMC4639974.
- 804 30. Rerks-Ngarm S, Pitisuttithum P, Excler JL, Nitayaphan S, Kaewkungwal J, Prensri N, et al.  
805 Randomized, Double-Blind Evaluation of Late Boost Strategies for HIV-Uninfected Vaccine Recipients in  
806 the RV144 HIV Vaccine Efficacy Trial. *The Journal of infectious diseases*. 2017;215(8):1255-63. doi:  
807 10.1093/infdis/jix099. PubMed PMID: 28329190; PubMed Central PMCID: PMC5853427.
- 808 31. Kepler TB, Munshaw S, Wiehe K, Zhang R, Yu JS, Woods CW, et al. Reconstructing a B-Cell Clonal  
809 Lineage. II. Mutation, Selection, and Affinity Maturation. *Frontiers in immunology*. 2014;5:170. doi:  
810 10.3389/fimmu.2014.00170. PubMed PMID: 24795717; PubMed Central PMCID: PMC4001017.
- 811 32. Easterhoff D, Moody MA, Fera D, Cheng H, Ackerman M, Wiehe K, et al. Boosting of HIV  
812 envelope CD4 binding site antibodies with long variable heavy third complementarity determining  
813 region in the randomized double blind RV305 HIV-1 vaccine trial. *PLoS pathogens*. 2017;13(2):e1006182.  
814 doi: 10.1371/journal.ppat.1006182. PubMed PMID: 28235027; PubMed Central PMCID: PMC5342261.
- 815 33. Montefiori DC. Evaluating neutralizing antibodies against HIV, SIV, and SHIV in luciferase  
816 reporter gene assays. *Current protocols in immunology*. 2005;Chapter 12:Unit 12.1. doi:  
817 10.1002/0471142735.im1211s64. PubMed PMID: 18432938.
- 818 34. Edmonds TG, Ding H, Yuan X, Wei Q, Smith KS, Conway JA, et al. Replication competent  
819 molecular clones of HIV-1 expressing Renilla luciferase facilitate the analysis of antibody inhibition in  
820 PBMC. *Virology*. 2010;408(1):1-13. doi: 10.1016/j.virol.2010.08.028. PubMed PMID: 20863545; PubMed  
821 Central PMCID: PMC2993081.
- 822 35. Adachi A, Gendelman HE, Koenig S, Folks T, Willey R, Rabson A, et al. Production of acquired  
823 immunodeficiency syndrome-associated retrovirus in human and nonhuman cells transfected with an  
824 infectious molecular clone. *Journal of virology*. 1986;59(2):284-91. PubMed PMID: 3016298; PubMed  
825 Central PMCID: PMC253077.
- 826 36. Pollara J, Hart L, Brewer F, Pickeral J, Packard BZ, Hoxie JA, et al. High-throughput quantitative  
827 analysis of HIV-1 and SIV-specific ADCC-mediating antibody responses. *Cytometry Part A : the journal of*  
828 *the International Society for Analytical Cytology*. 2011;79(8):603-12. doi: 10.1002/cyto.a.21084. PubMed  
829 PMID: 21735545; PubMed Central PMCID: PMC3692008.

- 830 37. Liao HX, Bonsignori M, Alam SM, McLellan JS, Tomaras GD, Moody MA, et al. Vaccine induction  
831 of antibodies against a structurally heterogeneous site of immune pressure within HIV-1 envelope  
832 protein variable regions 1 and 2. *Immunity*. 2013;38(1):176-86. doi: 10.1016/j.immuni.2012.11.011.  
833 PubMed PMID: 23313589; PubMed Central PMCID: PMC3569735.
- 834 38. Trkola A, Matthews J, Gordon C, Ketas T, Moore JP. A cell line-based neutralization assay for  
835 primary human immunodeficiency virus type 1 isolates that use either the CCR5 or the CXCR4  
836 coreceptor. *Journal of virology*. 1999;73(11):8966-74. PubMed PMID: 10516002; PubMed Central  
837 PMCID: PMC112928.
- 838 39. Koene HR, Kleijer M, Algra J, Roos D, von dem Borne AE, de Haas M. Fc gammaRIIIa-158V/F  
839 polymorphism influences the binding of IgG by natural killer cell Fc gammaRIIIa, independently of the Fc  
840 gammaRIIIa-48L/R/H phenotype. *Blood*. 1997;90(3):1109-14. PubMed PMID: 9242542.
- 841 40. Bruhns P, Iannascoli B, England P, Mancardi DA, Fernandez N, Jorieux S, et al. Specificity and  
842 affinity of human Fc gamma receptors and their polymorphic variants for human IgG subclasses. *Blood*.  
843 2009;113(16):3716-25. doi: 10.1182/blood-2008-09-179754. PubMed PMID: 19018092.
- 844 41. Hotelling H. Analysis of a complex of statistical variables into principal components. *Journal of*  
845 *Educational Psychology*. 1933;24(6):417-41. doi: 10.1037/h0071325.
- 846 42. Moody MA, Pedroza-Pacheco I, Vandergrift NA, Chui C, Lloyd KE, Parks R, et al. Immune  
847 perturbations in HIV-1-infected individuals who make broadly neutralizing antibodies. *Science*  
848 *immunology*. 2016;1(1):aag0851. Epub 2017/08/08. doi: 10.1126/sciimmunol.aag0851. PubMed PMID:  
849 28783677; PubMed Central PMCID: PMC5589960.
- 850 43. Jackson JE. *A user's guide to principal components*: John Wiley & Sons; 2005.
- 851 44. Salazar-Gonzalez JF, Salazar MG, Keele BF, Learn GH, Giorgi EE, Li H, et al. Genetic identity,  
852 biological phenotype, and evolutionary pathways of transmitted/founder viruses in acute and early HIV-  
853 1 infection. *The Journal of experimental medicine*. 2009;206(6):1273-89. doi: 10.1084/jem.20090378.  
854 PubMed PMID: 19487424; PubMed Central PMCID: PMC2715054.
- 855 45. Ochsenbauer C, Edmonds TG, Ding H, Keele BF, Decker J, Salazar MG, et al. Generation of  
856 transmitted/founder HIV-1 infectious molecular clones and characterization of their replication capacity  
857 in CD4 T lymphocytes and monocyte-derived macrophages. *Journal of virology*. 2012;86(5):2715-28. doi:  
858 10.1128/JVI.06157-11. PubMed PMID: 22190722; PubMed Central PMCID: PMC3302286.
- 859 46. Martin L, Stricher F, Misse D, Sironi F, Pugniere M, Barthe P, et al. Rational design of a CD4  
860 mimic that inhibits HIV-1 entry and exposes cryptic neutralization epitopes. *Nat Biotechnol*.  
861 2003;21(1):71-6. PubMed PMID: 12483221.
- 862 47. Otwinowski Z, Minor W, Charles W. Carter, Jr. Processing of X-ray diffraction data collected in  
863 oscillation mode. *Methods in Enzymology*. Volume 276: Academic Press; 1997. p. 307-26.
- 864 48. McCoy AJ. Solving structures of protein complexes by molecular replacement with Phaser. *Acta*  
865 *Crystallogr D Biol Crystallogr*. 2007;63(Pt 1):32-41. Epub 2006/12/14. doi: S0907444906045975 [pii]  
866 10.1107/S0907444906045975. PubMed PMID: 17164524.
- 867 49. N. CCP. The CCP4 suite: programs for protein crystallography. *Acta Crystallogr D Biol Crystallogr*.  
868 1994;50(Pt 5):760-3. Epub 1994/09/01. doi: 10.1107/S0907444994003112  
869 S0907444994003112 [pii]. PubMed PMID: 15299374.
- 870 50. Murshudov GN, Vagin AA, Dodson EJ. Refinement of macromolecular structures by the  
871 maximum-likelihood method. *Acta Crystallogr D Biol Crystallogr*. 1997;53(Pt 3):240-55. Epub  
872 1997/05/01. doi: 10.1107/S0907444996012255  
873 S0907444996012255 [pii]. PubMed PMID: 15299926.

- 874 51. Adams PD, Grosse-Kunstleve RW, Hung LW, Ioerger TR, McCoy AJ, Moriarty NW, et al. PHENIX:  
875 building new software for automated crystallographic structure determination. *Acta Crystallogr D Biol*  
876 *Crystallogr.* 2002;58(Pt 11):1948-54. PubMed PMID: 12393927.
- 877 52. Emsley P, Cowtan K. Coot: model-building tools for molecular graphics. *Acta Crystallogr D Biol*  
878 *Crystallogr.* 2004;60(Pt 12 Pt 1):2126-32. Epub 2004/12/02. doi: S0907444904019158 [pii]  
879 10.1107/S0907444904019158. PubMed PMID: 15572765.
- 880 53. Chen VB, Arendall WB, 3rd, Headd JJ, Keedy DA, Immormino RM, Kapral GJ, et al. MolProbity:  
881 all-atom structure validation for macromolecular crystallography. *Acta Crystallogr D Biol Crystallogr.*  
882 2010;66(Pt 1):12-21. Epub 2010/01/09. doi: S0907444909042073 [pii]  
883 10.1107/S0907444909042073. PubMed PMID: 20057044; PubMed Central PMCID: PMC2803126.
- 884 54. Krissinel E, Henrick K. Inference of macromolecular assemblies from crystalline state. *J Mol Biol.*  
885 2007;372(3):774-97. Epub 2007/08/08. doi: S0022-2836(07)00642-0 [pii]
- 886 10.1016/j.jmb.2007.05.022. PubMed PMID: 17681537.
- 887

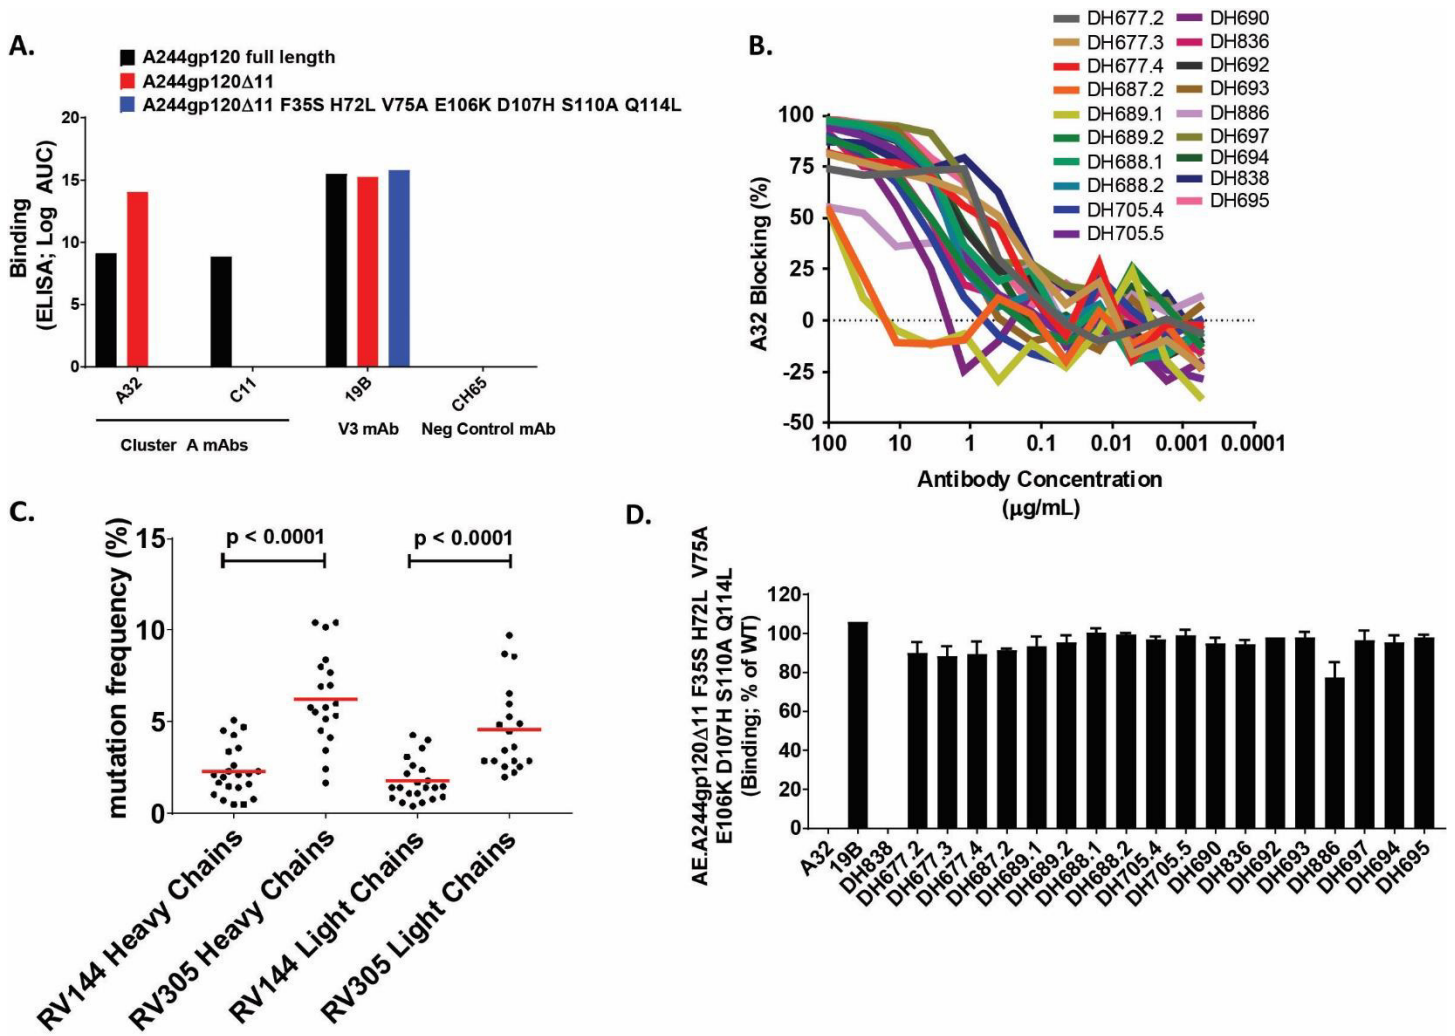

Figure 1.

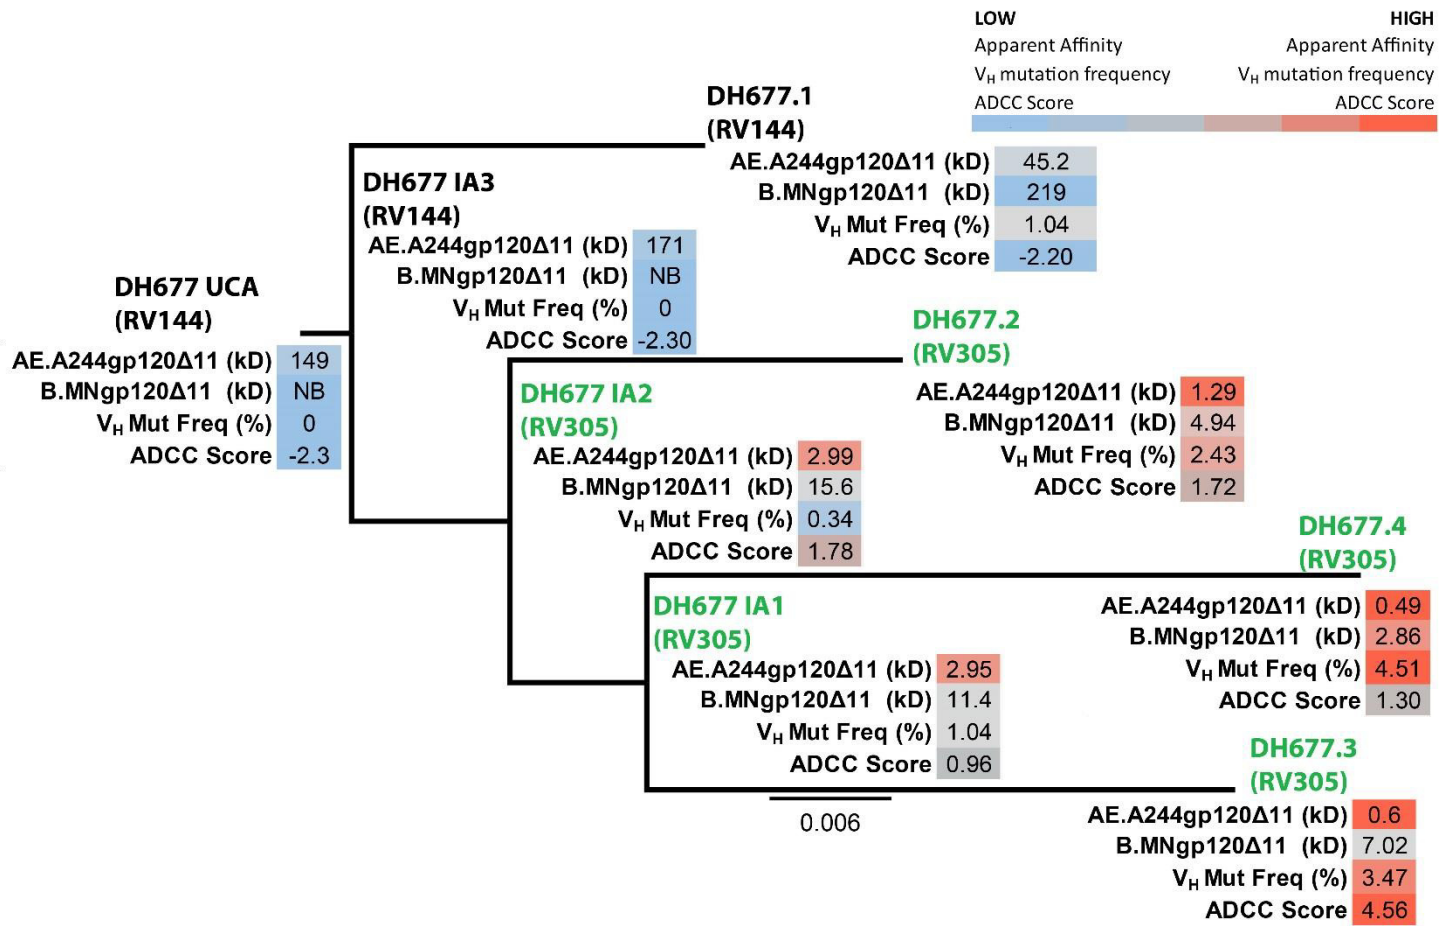

Figure 2.

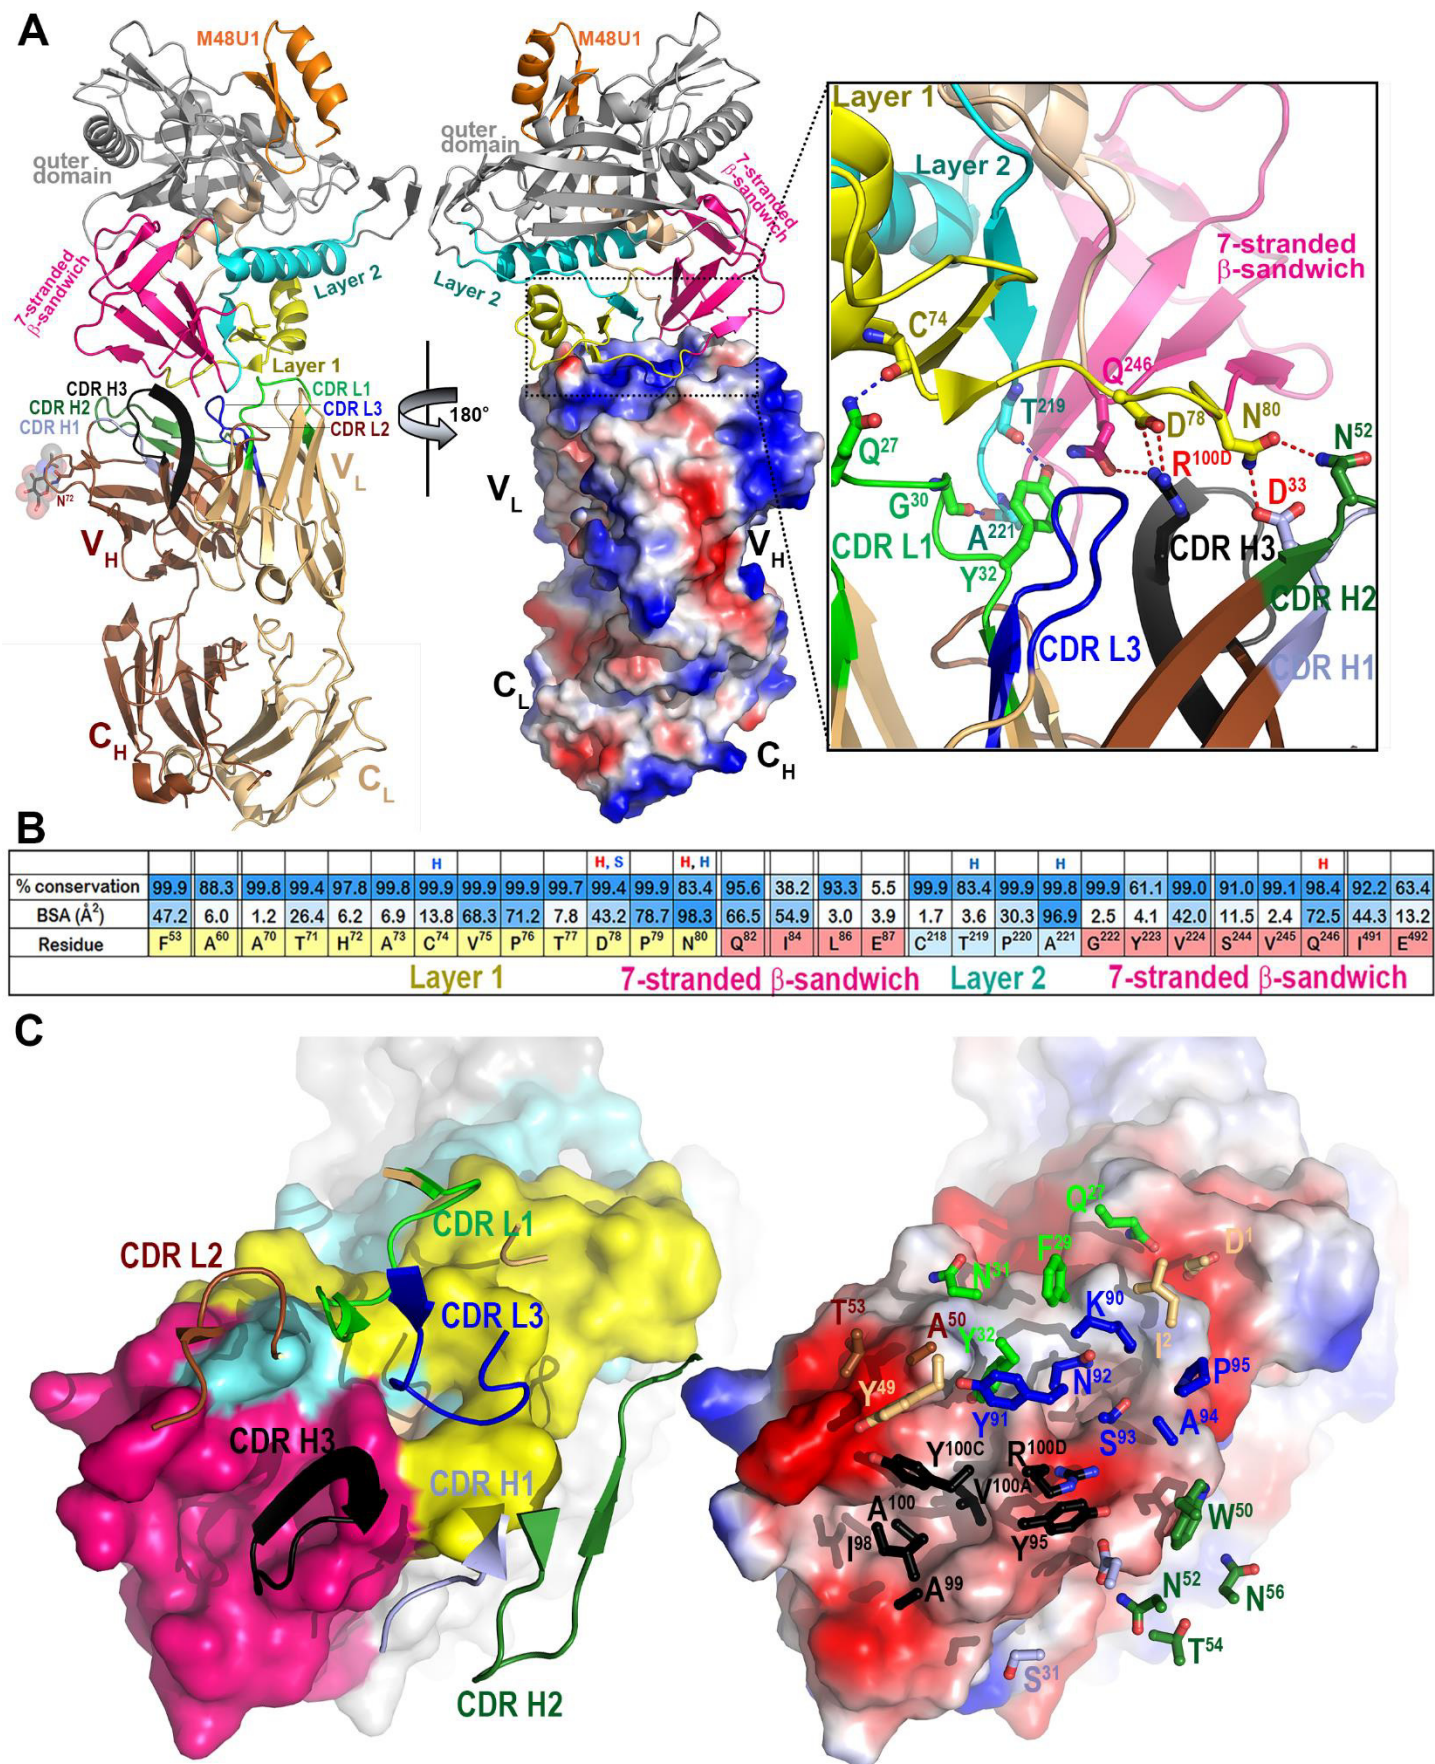

Figure 3.

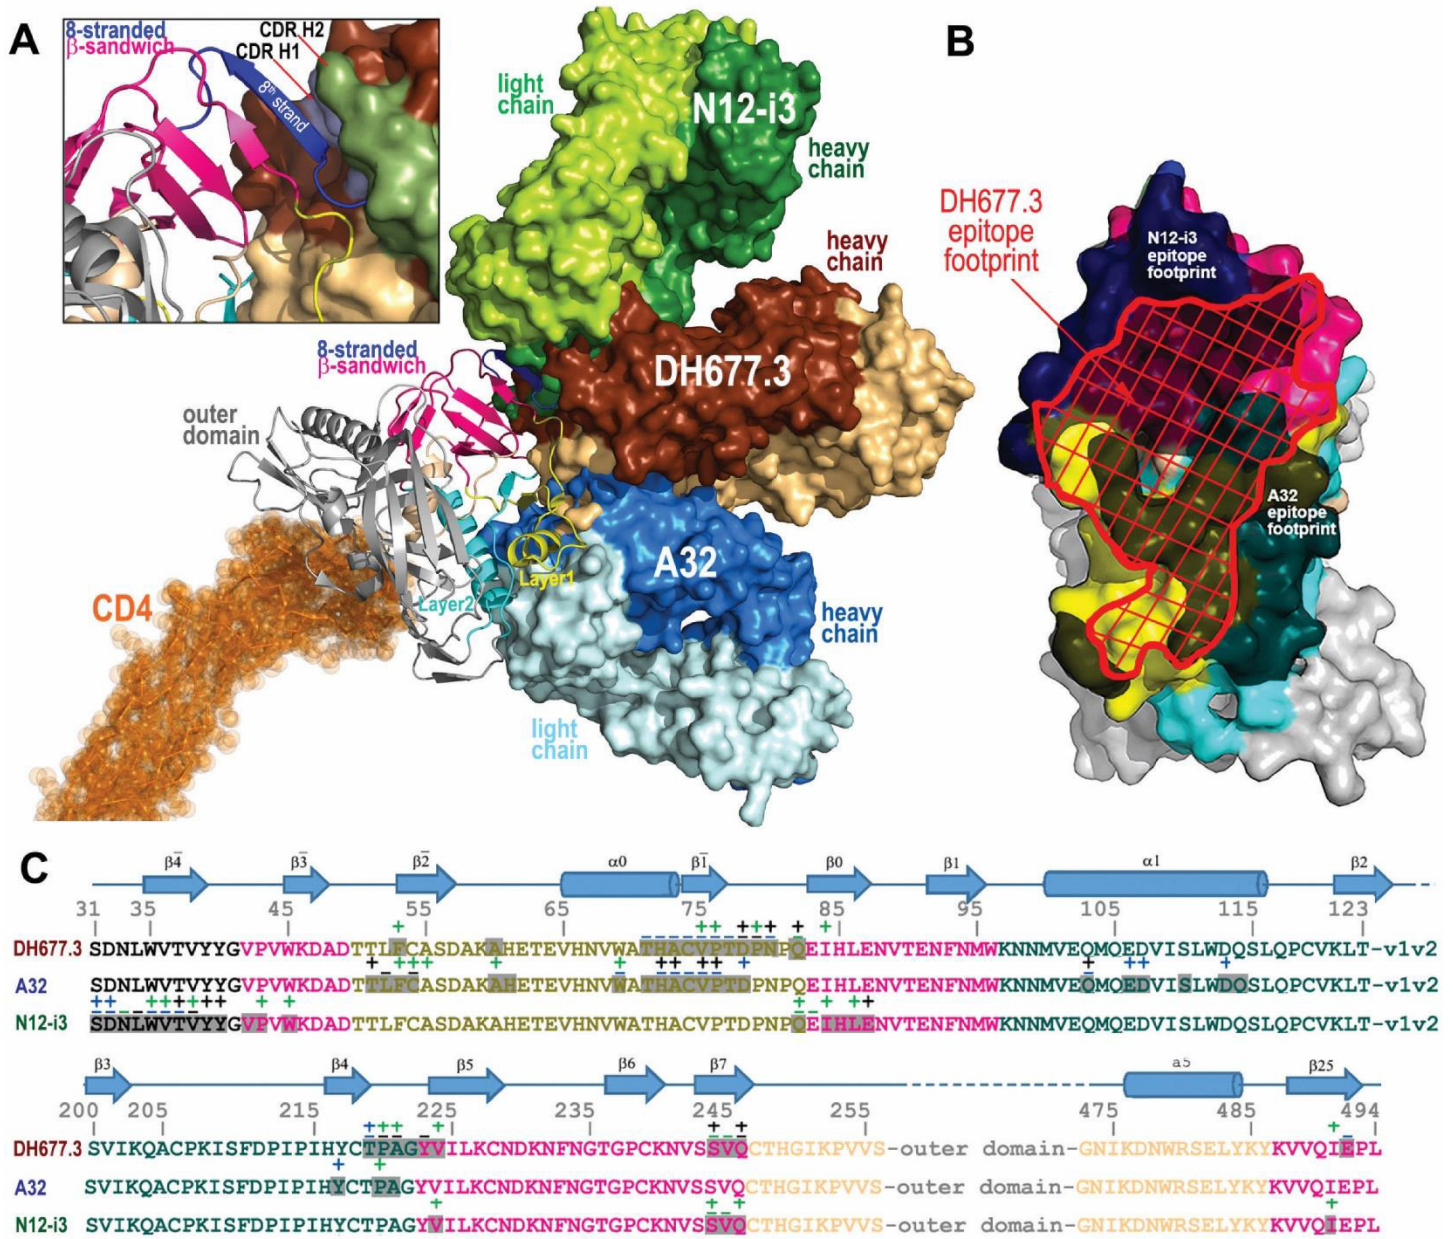

Figure 4.

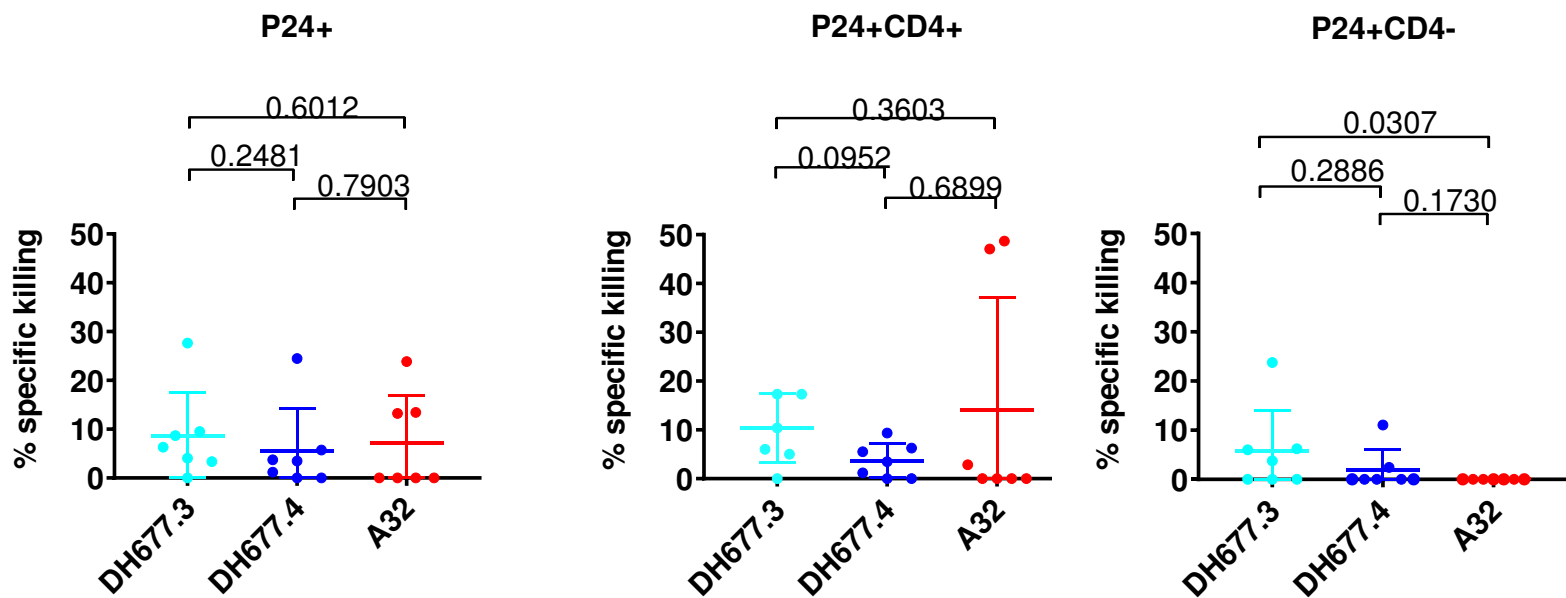

Figure 5.



**Table1: Ranking C1C2-specific antibodies by ADCC breadth and potency**

| <b>Rank</b> | <b>Antibody</b> | <b>Study</b> | <b>Score</b> | <b>Average AUC</b> | <b>Number of strains recognized</b> |
|-------------|-----------------|--------------|--------------|--------------------|-------------------------------------|
| 1           | A32             |              | 6.62         | 198.70             | 7                                   |
| 2           | CH38            | RV144        | 6.28         | 186.56             | 6                                   |
| 3           | DH677.3         | RV305        | 4.56         | 146.90             | 7                                   |
| 4           | DH697           | RV305        | 2.70         | 111.98             | 7                                   |
| 5           | DH677.2         | RV305        | 1.72         | 111.76             | 5                                   |
| 6           | DH838           | RV305        | 1.62         | 107.24             | 4                                   |
| 7           | DH677.4         | RV305        | 1.30         | 94.00              | 6                                   |
| 8           | DH695           | RV305        | 0.86         | 82.94              | 7                                   |
| 9           | DH688.1         | RV305        | 0.66         | 77.94              | 6                                   |
| 10          | DH694           | RV305        | 0.58         | 80.18              | 5                                   |
| 11          | DH705.5         | RV305        | 0.52         | 75.84              | 5                                   |
| 12          | DH705.4         | RV305        | 0.46         | 75.46              | 6                                   |
| 13          | DH690           | RV305        | 0.36         | 67.44              | 7                                   |
| 14          | DH692           | RV305        | 0.08         | 65.14              | 6                                   |
| 15          | DH693           | RV305        | 0.06         | 64.54              | 7                                   |
| 16          | DH886           | RV305        | -0.08        | 67.96              | 5                                   |
| 17          | DH688.2         | RV305        | -0.30        | 60.42              | 5                                   |
| 18          | DH836           | RV305        | -0.32        | 62.52              | 5                                   |
| 19          | CH57            | RV144        | -0.48        | 53.22              | 5                                   |
| 20          | CH90            | RV144        | -1.06        | 38.98              | 5                                   |
| 21          | CH54            | RV144        | -1.20        | 34.58              | 5                                   |
| 22          | DH689.2         | RV305        | -1.42        | 24.54              | 6                                   |
| 23          | DH689.1         | RV305        | -1.68        | 26.48              | 6                                   |
| 24          | DH677.1         | RV144        | -2.20        | 16.38              | 2                                   |
| 25          | DH687.2         | RV305        | -2.70        | 0.16               | 2                                   |
